# Supplementary material
Source: publisher figshare collection journal article supplement (https://acs.figshare.com/ndownloader/files/4405033)
Supplement: Supplementary file 1 [file 4405033]

data_24
 
_audit_creation_method            SHELXL-97
_chemical_name_systematic
;
 ?
;
_chemical_name_common             ?
_chemical_melting_point           ?
_chemical_absolute_configuration  syn
_chemical_formula_moiety          '4(C30 H24 N2 O2), C4 H10 O'
_chemical_formula_sum             'C124 H106 N8 O9'
_chemical_formula_weight          1852.17
 
loop_
 _atom_type_symbol
 _atom_type_description
 _atom_type_scat_dispersion_real
 _atom_type_scat_dispersion_imag
 _atom_type_scat_source
 'C'  'C'   0.0033   0.0000
 'International Tables Vol C Tables 4.2.6.8 and 6.1.1.4'
 'H'  'H'   0.0000   0.0000
 'International Tables Vol C Tables 4.2.6.8 and 6.1.1.4'
 'N'  'N'   0.0061   0.0000
 'International Tables Vol C Tables 4.2.6.8 and 6.1.1.4'
 'O'  'O'   0.0106   0.0000
 'International Tables Vol C Tables 4.2.6.8 and 6.1.1.4'
 
_symmetry_cell_setting            Monoclinic
_symmetry_space_group_name_H-M    P2(1)
 
loop_
 _symmetry_equiv_pos_as_xyz
 'x, y, z'
 '-x, y+1/2, -z'
 
_cell_length_a                    20.3120(9)
_cell_length_b                    9.5308(4)
_cell_length_c                    26.2849(12)
_cell_angle_alpha                 90.00
_cell_angle_beta                  107.355(1)
_cell_angle_gamma                 90.00
_cell_volume                      4856.8(4)
_cell_formula_units_Z             2
_cell_measurement_temperature     85(2)
_cell_measurement_reflns_used     9977
_cell_measurement_theta_min       2.18
_cell_measurement_theta_max       28.26
 
_exptl_crystal_description        needle
_exptl_crystal_colour             yellow
_exptl_crystal_size_max           0.34
_exptl_crystal_size_mid           0.19
_exptl_crystal_size_min           0.13
_exptl_crystal_density_meas       ?
_exptl_crystal_density_diffrn     1.267
_exptl_crystal_density_method     'not measured'
_exptl_crystal_F_000              1956
_exptl_absorpt_coefficient_mu     0.080
_exptl_absorpt_correction_type    multi-scan
_exptl_absorpt_correction_T_min   0.9733
_exptl_absorpt_correction_T_max   0.9897
_exptl_absorpt_process_details
;
  Blessing, R. Acta Cryst. (1995) A51 33-38.
  Sheldrick, G.  SADABS (Version 2008/1) Bruker AXS area
  detector absorption and other corrections, University of
  Gottingen, Germany 2008.
;
 
 
_exptl_special_details
;
 3182 frames x 15 sec. @ 5.055 cm; 0.5 deg. steps in omega, 0.45 deg. in phi
;
 
_diffrn_ambient_temperature       85(2)
_diffrn_radiation_wavelength      0.71073
_diffrn_radiation_type            MoK\a
_diffrn_radiation_source          'fine-focus sealed tube'
_diffrn_radiation_monochromator   graphite
_diffrn_measurement_device_type   'CCD area detector'
_diffrn_measurement_method        'phi and omega scans'
_diffrn_detector_area_resol_mean  ?
_diffrn_reflns_number             132594
_diffrn_reflns_av_R_equivalents   0.0514
_diffrn_reflns_av_sigmaI/netI     0.0248
_diffrn_reflns_limit_h_min        -27
_diffrn_reflns_limit_h_max        27
_diffrn_reflns_limit_k_min        -12
_diffrn_reflns_limit_k_max        12
_diffrn_reflns_limit_l_min        -35
_diffrn_reflns_limit_l_max        35
_diffrn_reflns_theta_min          1.05
_diffrn_reflns_theta_max          28.35
_reflns_number_total              12817
_reflns_number_gt                 11858
_reflns_threshold_expression      >2sigma(I)
 
_computing_data_collection        'Bruker SMART-APEX'
_computing_cell_refinement        'Bruker SAINT'
_computing_data_reduction         'Bruker SAINT'
_computing_structure_solution     'SHELXS-97 (Sheldrick, 2008)'
_computing_structure_refinement   'SHELXL-97 (Sheldrick, 2008)'
_computing_molecular_graphics     'Bruker SHELXTL'
_computing_publication_material   'Bruker SHELXTL'
 
_refine_special_details
;
 Refinement of F^2^ against ALL reflections.  The weighted R-factor wR and
 goodness of fit S are based on F^2^, conventional R-factors R are based
 on F, with F set to zero for negative F^2^. The threshold expression of
 F^2^ > 2sigma(F^2^) is used only for calculating R-factors(gt) etc. and is
 not relevant to the choice of reflections for refinement.  R-factors based
 on F^2^ are statistically about twice as large as those based on F, and R-
 factors based on ALL data will be even larger.
;
 
_refine_ls_structure_factor_coef  Fsqd
_refine_ls_matrix_type            full
_refine_ls_weighting_scheme       calc
_refine_ls_weighting_details
 'calc w=1/[\s^2^(Fo^2^)+(0.0556P)^2^+0.9784P] where P=(Fo^2^+2Fc^2^)/3'
_atom_sites_solution_primary      direct
_atom_sites_solution_secondary    difmap
_atom_sites_solution_hydrogens    geom
_refine_ls_hydrogen_treatment     mixed
_refine_ls_extinction_method      none
_refine_ls_extinction_coef        ?
_refine_ls_abs_structure_details
 'Flack H D (1983), Acta Cryst. A39, 876-881'
_refine_ls_abs_structure_Flack    0(10)
_refine_ls_number_reflns          12817
_refine_ls_number_parameters      1288
_refine_ls_number_restraints      1
_refine_ls_R_factor_all           0.0410
_refine_ls_R_factor_gt            0.0368
_refine_ls_wR_factor_ref          0.0943
_refine_ls_wR_factor_gt           0.0913
_refine_ls_goodness_of_fit_ref    1.030
_refine_ls_restrained_S_all       1.030
_refine_ls_shift/su_max           0.001
_refine_ls_shift/su_mean          0.000
 
loop_
 _atom_site_label
 _atom_site_type_symbol
 _atom_site_fract_x
 _atom_site_fract_y
 _atom_site_fract_z
 _atom_site_U_iso_or_equiv
 _atom_site_adp_type
 _atom_site_occupancy
 _atom_site_symmetry_multiplicity
 _atom_site_calc_flag
 _atom_site_refinement_flags
 _atom_site_disorder_assembly
 _atom_site_disorder_group
O1 O 0.21134(7) 0.62998(17) 0.93574(6) 0.0237(3) Uani 1 1 d . . .
O2 O 0.17808(7) 0.92346(17) 0.91059(6) 0.0226(3) Uani 1 1 d . . .
H2 H 0.1991(15) 0.975(4) 0.9350(12) 0.039(8) Uiso 1 1 d . . .
O3 O 0.24522(7) 0.13368(17) -0.02479(6) 0.0246(3) Uani 1 1 d . . .
O4 O 0.28300(8) 0.42540(17) 0.00303(6) 0.0244(3) Uani 1 1 d . . .
H4 H 0.2654(15) 0.468(4) -0.0267(12) 0.043(8) Uiso 1 1 d . . .
O5 O 0.25541(7) 0.40747(18) 0.55550(6) 0.0257(3) Uani 1 1 d . . .
O6 O 0.25735(8) 0.10864(18) 0.57452(6) 0.0253(3) Uani 1 1 d . . .
H6 H 0.2544(16) 0.042(4) 0.5516(13) 0.048(9) Uiso 1 1 d . . .
O7 O 0.25865(7) 0.88104(18) 0.51280(6) 0.0271(3) Uani 1 1 d . . .
O8 O 0.26555(7) 0.59157(16) 0.47944(6) 0.0230(3) Uani 1 1 d . . .
H8 H 0.2685(14) 0.551(3) 0.5094(11) 0.035(7) Uiso 1 1 d . . .
O9 O 0.61124(8) 0.49710(19) 0.28270(7) 0.0343(4) Uani 1 1 d . . .
N1 N 0.10875(8) 0.89326(17) 0.96986(6) 0.0171(3) Uani 1 1 d . . .
N2 N 0.01567(8) 0.73903(17) 0.89586(6) 0.0150(3) Uani 1 1 d . . .
N3 N 0.38362(8) 0.36232(18) -0.02257(6) 0.0184(3) Uani 1 1 d . . .
N4 N 0.43156(8) 0.20883(17) 0.06844(6) 0.0159(3) Uani 1 1 d . . .
N5 N 0.13748(8) 0.12380(18) 0.52334(6) 0.0169(3) Uani 1 1 d . . .
N6 N 0.10638(8) 0.25978(17) 0.60460(6) 0.0152(3) Uani 1 1 d . . .
N7 N 0.38769(8) 0.63695(18) 0.50755(6) 0.0180(3) Uani 1 1 d . . .
N8 N 0.37429(8) 0.79654(17) 0.41992(6) 0.0161(3) Uani 1 1 d . . .
C1 C 0.17383(9) 0.6979(2) 0.95496(7) 0.0172(3) Uani 1 1 d . . .
C2 C 0.13585(9) 0.8325(2) 0.92865(7) 0.0172(4) Uani 1 1 d . . .
C3 C 0.04193(10) 0.9628(2) 0.94498(7) 0.0184(4) Uani 1 1 d . . .
H3A H 0.0482 1.0648 0.9410 0.022 Uiso 1 1 calc R . .
H3B H 0.0100 0.9483 0.9665 0.022 Uiso 1 1 calc R . .
C4 C 0.01496(10) 0.8927(2) 0.89106(7) 0.0177(4) Uani 1 1 d . . .
H4A H -0.0196 0.9409 0.8609 0.021 Uiso 1 1 calc R . .
C5 C 0.07189(9) 0.8081(2) 0.88151(7) 0.0170(3) Uani 1 1 d . . .
H5A H 0.0760 0.7984 0.8447 0.020 Uiso 1 1 calc R . .
C6 C -0.03451(9) 0.65180(19) 0.85497(7) 0.0150(3) Uani 1 1 d . . .
C7 C -0.09727(9) 0.6264(2) 0.87520(7) 0.0155(3) Uani 1 1 d . . .
C8 C -0.10008(10) 0.6778(2) 0.92423(7) 0.0180(4) Uani 1 1 d . . .
H8A H -0.0636 0.7343 0.9453 0.022 Uiso 1 1 calc R . .
C9 C -0.15618(10) 0.6465(2) 0.94236(7) 0.0196(4) Uani 1 1 d . . .
H9A H -0.1581 0.6836 0.9754 0.024 Uiso 1 1 calc R . .
C10 C -0.20911(10) 0.5620(2) 0.91267(8) 0.0210(4) Uani 1 1 d . . .
H10A H -0.2466 0.5388 0.9257 0.025 Uiso 1 1 calc R . .
C11 C -0.20705(10) 0.5113(2) 0.86352(8) 0.0209(4) Uani 1 1 d . . .
H11A H -0.2434 0.4539 0.8428 0.025 Uiso 1 1 calc R . .
C12 C -0.15198(10) 0.5444(2) 0.84487(8) 0.0190(4) Uani 1 1 d . . .
H12A H -0.1514 0.5109 0.8110 0.023 Uiso 1 1 calc R . .
C13 C 0.00017(9) 0.5078(2) 0.85476(7) 0.0162(3) Uani 1 1 d . . .
C14 C 0.05159(10) 0.4624(2) 0.89993(8) 0.0190(4) Uani 1 1 d . . .
H14A H 0.0653 0.5213 0.9304 0.023 Uiso 1 1 calc R . .
C15 C 0.08319(11) 0.3318(2) 0.90105(8) 0.0228(4) Uani 1 1 d . . .
H15A H 0.1190 0.3037 0.9318 0.027 Uiso 1 1 calc R . .
C16 C 0.06228(11) 0.2429(2) 0.85736(8) 0.0236(4) Uani 1 1 d . . .
H16A H 0.0838 0.1542 0.8578 0.028 Uiso 1 1 calc R . .
C17 C 0.00948(11) 0.2854(2) 0.81287(8) 0.0229(4) Uani 1 1 d . . .
H17A H -0.0059 0.2241 0.7832 0.028 Uiso 1 1 calc R . .
C18 C -0.02106(10) 0.4164(2) 0.81142(7) 0.0191(4) Uani 1 1 d . . .
H18A H -0.0568 0.4441 0.7806 0.023 Uiso 1 1 calc R . .
C19 C -0.05631(9) 0.7229(2) 0.80016(7) 0.0170(3) Uani 1 1 d . . .
C20 C -0.11188(10) 0.8166(2) 0.78675(7) 0.0190(4) Uani 1 1 d . . .
H20A H -0.1391 0.8281 0.8103 0.023 Uiso 1 1 calc R . .
C21 C -0.12800(11) 0.8932(2) 0.73968(8) 0.0247(4) Uani 1 1 d . . .
H21A H -0.1652 0.9580 0.7318 0.030 Uiso 1 1 calc R . .
C22 C -0.09002(12) 0.8755(3) 0.70410(8) 0.0285(5) Uani 1 1 d . . .
H22A H -0.1016 0.9265 0.6716 0.034 Uiso 1 1 calc R . .
C23 C -0.03503(11) 0.7826(3) 0.71657(8) 0.0264(4) Uani 1 1 d . . .
H23A H -0.0090 0.7694 0.6923 0.032 Uiso 1 1 calc R . .
C24 C -0.01766(10) 0.7084(2) 0.76447(7) 0.0207(4) Uani 1 1 d . . .
H24A H 0.0210 0.6472 0.7730 0.025 Uiso 1 1 calc R . .
C25 C 0.11396(9) 0.7916(2) 1.00904(7) 0.0165(3) Uani 1 1 d . . .
C26 C 0.15514(9) 0.6771(2) 1.00418(7) 0.0173(4) Uani 1 1 d . . .
C27 C 0.16791(10) 0.5664(2) 1.04059(8) 0.0206(4) Uani 1 1 d . . .
H27A H 0.1959 0.4893 1.0372 0.025 Uiso 1 1 calc R . .
C28 C 0.13860(10) 0.5722(2) 1.08195(8) 0.0216(4) Uani 1 1 d . . .
H28A H 0.1464 0.4981 1.1072 0.026 Uiso 1 1 calc R . .
C29 C 0.09758(10) 0.6869(2) 1.08667(8) 0.0211(4) Uani 1 1 d . . .
H29A H 0.0782 0.6890 1.1154 0.025 Uiso 1 1 calc R . .
C30 C 0.08455(10) 0.7970(2) 1.05079(7) 0.0194(4) Uani 1 1 d . . .
H30A H 0.0565 0.8739 1.0544 0.023 Uiso 1 1 calc R . .
C31 C 0.29732(9) 0.1895(2) -0.02973(7) 0.0178(4) Uani 1 1 d . . .
C32 C 0.33045(10) 0.3205(2) 0.00200(7) 0.0181(4) Uani 1 1 d . . .
C33 C 0.44412(10) 0.4213(2) 0.01837(8) 0.0219(4) Uani 1 1 d . . .
H33A H 0.4423 0.5251 0.0185 0.026 Uiso 1 1 calc R . .
H33B H 0.4877 0.3914 0.0120 0.026 Uiso 1 1 calc R . .
C34 C 0.43860(10) 0.3619(2) 0.07055(8) 0.0196(4) Uani 1 1 d . . .
H34A H 0.4607 0.4109 0.1051 0.024 Uiso 1 1 calc R . .
C35 C 0.36957(10) 0.2946(2) 0.06007(7) 0.0176(4) Uani 1 1 d . . .
H35A H 0.3449 0.2975 0.0878 0.021 Uiso 1 1 calc R . .
C36 C 0.45605(9) 0.1256(2) 0.11884(7) 0.0158(3) Uani 1 1 d . . .
C37 C 0.43705(10) 0.1948(2) 0.16555(7) 0.0176(4) Uani 1 1 d . . .
C38 C 0.48000(10) 0.2939(2) 0.19871(7) 0.0199(4) Uani 1 1 d . . .
H38A H 0.5235 0.3153 0.1940 0.024 Uiso 1 1 calc R . .
C39 C 0.45969(11) 0.3616(2) 0.23852(8) 0.0254(4) Uani 1 1 d . . .
H39A H 0.4898 0.4273 0.2612 0.030 Uiso 1 1 calc R . .
C40 C 0.39584(11) 0.3338(2) 0.24522(8) 0.0267(4) Uani 1 1 d . . .
H40A H 0.3822 0.3799 0.2725 0.032 Uiso 1 1 calc R . .
C41 C 0.35194(11) 0.2382(2) 0.21187(8) 0.0244(4) Uani 1 1 d . . .
H41A H 0.3077 0.2201 0.2158 0.029 Uiso 1 1 calc R . .
C42 C 0.37258(10) 0.1690(2) 0.17277(8) 0.0210(4) Uani 1 1 d . . .
H42A H 0.3424 0.1029 0.1505 0.025 Uiso 1 1 calc R . .
C43 C 0.53475(9) 0.1091(2) 0.13118(7) 0.0183(4) Uani 1 1 d . . .
C44 C 0.56925(10) 0.1459(2) 0.09459(8) 0.0217(4) Uani 1 1 d . . .
H44A H 0.5441 0.1843 0.0611 0.026 Uiso 1 1 calc R . .
C45 C 0.64059(11) 0.1267(2) 0.10665(9) 0.0264(4) Uani 1 1 d . . .
H45A H 0.6635 0.1537 0.0815 0.032 Uiso 1 1 calc R . .
C46 C 0.67782(11) 0.0691(3) 0.15467(9) 0.0314(5) Uani 1 1 d . . .
H46A H 0.7262 0.0560 0.1627 0.038 Uiso 1 1 calc R . .
C47 C 0.64408(12) 0.0305(3) 0.19119(9) 0.0338(5) Uani 1 1 d . . .
H47A H 0.6694 -0.0103 0.2242 0.041 Uiso 1 1 calc R . .
C48 C 0.57347(11) 0.0510(2) 0.17979(8) 0.0254(4) Uani 1 1 d . . .
H48A H 0.5511 0.0253 0.2054 0.030 Uiso 1 1 calc R . .
C49 C 0.42276(9) -0.0210(2) 0.10590(8) 0.0181(4) Uani 1 1 d . . .
C50 C 0.39275(10) -0.0640(2) 0.05376(8) 0.0209(4) Uani 1 1 d . . .
H50A H 0.3928 -0.0023 0.0254 0.025 Uiso 1 1 calc R . .
C51 C 0.36245(11) -0.1963(2) 0.04212(9) 0.0272(4) Uani 1 1 d . . .
H51A H 0.3413 -0.2230 0.0061 0.033 Uiso 1 1 calc R . .
C52 C 0.36304(12) -0.2887(2) 0.08284(10) 0.0314(5) Uani 1 1 d . . .
H52A H 0.3420 -0.3784 0.0750 0.038 Uiso 1 1 calc R . .
C53 C 0.39458(13) -0.2489(2) 0.13504(10) 0.0319(5) Uani 1 1 d . . .
H53A H 0.3963 -0.3127 0.1632 0.038 Uiso 1 1 calc R . .
C54 C 0.42371(11) -0.1164(2) 0.14664(8) 0.0250(4) Uani 1 1 d . . .
H54A H 0.4446 -0.0902 0.1827 0.030 Uiso 1 1 calc R . .
C55 C 0.39047(9) 0.2556(2) -0.05684(7) 0.0180(4) Uani 1 1 d . . .
C56 C 0.33887(9) 0.1528(2) -0.06412(7) 0.0174(4) Uani 1 1 d . . .
C57 C 0.33473(10) 0.0386(2) -0.09844(8) 0.0206(4) Uani 1 1 d . . .
H57A H 0.2996 -0.0301 -0.1029 0.025 Uiso 1 1 calc R . .
C58 C 0.38319(11) 0.0286(2) -0.12564(8) 0.0234(4) Uani 1 1 d . . .
H58A H 0.3817 -0.0477 -0.1492 0.028 Uiso 1 1 calc R . .
C59 C 0.43449(10) 0.1314(2) -0.11834(8) 0.0242(4) Uani 1 1 d . . .
H59A H 0.4671 0.1234 -0.1376 0.029 Uiso 1 1 calc R . .
C60 C 0.43963(10) 0.2447(2) -0.08406(8) 0.0216(4) Uani 1 1 d . . .
H60A H 0.4753 0.3123 -0.0793 0.026 Uiso 1 1 calc R . .
C61 C 0.20527(9) 0.3313(2) 0.53771(7) 0.0190(4) Uani 1 1 d . . .
C62 C 0.19677(9) 0.1890(2) 0.56283(7) 0.0176(4) Uani 1 1 d . . .
C63 C 0.09561(10) 0.0429(2) 0.55027(7) 0.0195(4) Uani 1 1 d . . .
H63A H 0.1077 -0.0580 0.5519 0.023 Uiso 1 1 calc R . .
H63B H 0.0458 0.0534 0.5315 0.023 Uiso 1 1 calc R . .
C64 C 0.11358(10) 0.1058(2) 0.60557(7) 0.0179(4) Uani 1 1 d . . .
H64A H 0.1071 0.0501 0.6360 0.021 Uiso 1 1 calc R . .
C65 C 0.17507(9) 0.1978(2) 0.61348(7) 0.0163(3) Uani 1 1 d . . .
H65A H 0.2105 0.2045 0.6492 0.020 Uiso 1 1 calc R . .
C66 C 0.09009(9) 0.3313(2) 0.64996(7) 0.0158(3) Uani 1 1 d . . .
C67 C 0.01105(9) 0.3517(2) 0.63297(7) 0.0168(3) Uani 1 1 d . . .
C68 C -0.03031(10) 0.3233(2) 0.58140(7) 0.0178(4) Uani 1 1 d . . .
H68A H -0.0104 0.2836 0.5563 0.021 Uiso 1 1 calc R . .
C69 C -0.10079(10) 0.3527(2) 0.56621(8) 0.0196(4) Uani 1 1 d . . .
H69A H -0.1286 0.3308 0.5311 0.023 Uiso 1 1 calc R . .
C70 C -0.13057(10) 0.4134(2) 0.60184(8) 0.0214(4) Uani 1 1 d . . .
H70A H -0.1784 0.4349 0.5912 0.026 Uiso 1 1 calc R . .
C71 C -0.08956(10) 0.4425(2) 0.65357(8) 0.0250(4) Uani 1 1 d . . .
H71A H -0.1095 0.4846 0.6783 0.030 Uiso 1 1 calc R . .
C72 C -0.01981(10) 0.4102(2) 0.66913(8) 0.0227(4) Uani 1 1 d . . .
H72A H 0.0074 0.4280 0.7048 0.027 Uiso 1 1 calc R . .
C73 C 0.12074(10) 0.4805(2) 0.65434(8) 0.0201(4) Uani 1 1 d . . .
C74 C 0.13295(10) 0.5429(2) 0.61017(9) 0.0254(4) Uani 1 1 d . . .
H74A H 0.1245 0.4916 0.5779 0.030 Uiso 1 1 calc R . .
C75 C 0.15746(11) 0.6801(2) 0.61289(12) 0.0358(6) Uani 1 1 d . . .
H75A H 0.1667 0.7208 0.5827 0.043 Uiso 1 1 calc R . .
C76 C 0.16845(12) 0.7571(3) 0.65901(13) 0.0446(7) Uani 1 1 d . . .
H76A H 0.1847 0.8509 0.6606 0.054 Uiso 1 1 calc R . .
C77 C 0.15571(12) 0.6969(3) 0.70324(12) 0.0409(6) Uani 1 1 d . . .
H77A H 0.1631 0.7499 0.7351 0.049 Uiso 1 1 calc R . .
C78 C 0.13226(11) 0.5593(3) 0.70116(10) 0.0292(5) Uani 1 1 d . . .
H78A H 0.1240 0.5186 0.7317 0.035 Uiso 1 1 calc R . .
C79 C 0.11647(10) 0.2472(2) 0.70190(7) 0.0179(4) Uani 1 1 d . . .
C80 C 0.07626(10) 0.1407(2) 0.71420(7) 0.0195(4) Uani 1 1 d . . .
H80A H 0.0299 0.1288 0.6926 0.023 Uiso 1 1 calc R . .
C81 C 0.10309(11) 0.0519(2) 0.75746(8) 0.0244(4) Uani 1 1 d . . .
H81A H 0.0751 -0.0206 0.7648 0.029 Uiso 1 1 calc R . .
C82 C 0.17050(11) 0.0684(3) 0.78994(8) 0.0288(5) Uani 1 1 d . . .
H82A H 0.1887 0.0081 0.8196 0.035 Uiso 1 1 calc R . .
C83 C 0.21086(11) 0.1739(3) 0.77862(8) 0.0279(5) Uani 1 1 d . . .
H83A H 0.2569 0.1862 0.8008 0.033 Uiso 1 1 calc R . .
C84 C 0.18453(10) 0.2624(2) 0.73499(7) 0.0219(4) Uani 1 1 d . . .
H84A H 0.2130 0.3338 0.7276 0.026 Uiso 1 1 calc R . .
C85 C 0.10550(9) 0.2261(2) 0.48640(7) 0.0168(3) Uani 1 1 d . . .
C86 C 0.14431(9) 0.3493(2) 0.49150(7) 0.0175(4) Uani 1 1 d . . .
C87 C 0.12077(10) 0.4641(2) 0.45791(8) 0.0203(4) Uani 1 1 d . . .
H87A H 0.1477 0.5470 0.4612 0.024 Uiso 1 1 calc R . .
C88 C 0.05700(10) 0.4536(2) 0.41958(8) 0.0200(4) Uani 1 1 d . . .
H88A H 0.0392 0.5309 0.3968 0.024 Uiso 1 1 calc R . .
C89 C 0.01863(10) 0.3290(2) 0.41440(7) 0.0204(4) Uani 1 1 d . . .
H89A H -0.0246 0.3233 0.3876 0.024 Uiso 1 1 calc R . .
C90 C 0.04176(10) 0.2142(2) 0.44706(7) 0.0193(4) Uani 1 1 d . . .
H90A H 0.0154 0.1303 0.4429 0.023 Uiso 1 1 calc R . .
C91 C 0.31282(10) 0.8199(2) 0.51656(7) 0.0183(4) Uani 1 1 d . . .
C92 C 0.31740(9) 0.6903(2) 0.48261(7) 0.0178(4) Uani 1 1 d . . .
C93 C 0.41508(10) 0.5733(2) 0.46679(7) 0.0197(4) Uani 1 1 d . . .
H93A H 0.4079 0.4704 0.4651 0.024 Uiso 1 1 calc R . .
H93B H 0.4650 0.5930 0.4745 0.024 Uiso 1 1 calc R . .
C94 C 0.37387(10) 0.6427(2) 0.41508(8) 0.0180(4) Uani 1 1 d . . .
H94A H 0.3691 0.5968 0.3799 0.022 Uiso 1 1 calc R . .
C95 C 0.31470(10) 0.7187(2) 0.42497(7) 0.0168(3) Uani 1 1 d . . .
H95A H 0.2694 0.7246 0.3965 0.020 Uiso 1 1 calc R . .
C96 C 0.36662(9) 0.8863(2) 0.37175(7) 0.0162(3) Uani 1 1 d . . .
C97 C 0.43990(9) 0.9121(2) 0.36811(7) 0.0171(3) Uani 1 1 d . . .
C98 C 0.49839(10) 0.8587(2) 0.40532(8) 0.0193(4) Uani 1 1 d . . .
H98A H 0.4935 0.8017 0.4336 0.023 Uiso 1 1 calc R . .
C99 C 0.56429(10) 0.8878(2) 0.40160(8) 0.0228(4) Uani 1 1 d . . .
H99A H 0.6037 0.8493 0.4270 0.027 Uiso 1 1 calc R . .
C100 C 0.57226(10) 0.9727(2) 0.36101(8) 0.0231(4) Uani 1 1 d . . .
H10F H 0.6170 0.9938 0.3588 0.028 Uiso 1 1 calc R . .
C101 C 0.51418(11) 1.0265(2) 0.32369(8) 0.0236(4) Uani 1 1 d . . .
H10D H 0.5193 1.0848 0.2958 0.028 Uiso 1 1 calc R . .
C102 C 0.44878(10) 0.9959(2) 0.32684(8) 0.0208(4) Uani 1 1 d . . .
H10B H 0.4095 1.0322 0.3007 0.025 Uiso 1 1 calc R . .
C103 C 0.32038(10) 0.8183(2) 0.32021(7) 0.0182(4) Uani 1 1 d . . .
C104 C 0.24831(10) 0.8289(2) 0.30678(8) 0.0210(4) Uani 1 1 d . . .
H10C H 0.2281 0.8829 0.3286 0.025 Uiso 1 1 calc R . .
C105 C 0.20597(11) 0.7617(2) 0.26194(8) 0.0254(4) Uani 1 1 d . . .
H10G H 0.1573 0.7695 0.2536 0.030 Uiso 1 1 calc R . .
C106 C 0.23451(12) 0.6835(3) 0.22951(8) 0.0290(5) Uani 1 1 d . . .
H10H H 0.2056 0.6395 0.1984 0.035 Uiso 1 1 calc R . .
C107 C 0.30580(12) 0.6698(2) 0.24272(8) 0.0271(4) Uani 1 1 d . . .
H10I H 0.3256 0.6145 0.2210 0.033 Uiso 1 1 calc R . .
C108 C 0.34819(10) 0.7368(2) 0.28771(8) 0.0217(4) Uani 1 1 d . . .
H10E H 0.3968 0.7268 0.2964 0.026 Uiso 1 1 calc R . .
C109 C 0.33742(9) 1.0277(2) 0.38360(8) 0.0180(4) Uani 1 1 d . . .
C110 C 0.30506(10) 1.1212(2) 0.34263(8) 0.0238(4) Uani 1 1 d . . .
H11E H 0.2997 1.0962 0.3066 0.029 Uiso 1 1 calc R . .
C111 C 0.28067(11) 1.2501(2) 0.35406(10) 0.0309(5) Uani 1 1 d . . .
H11H H 0.2594 1.3127 0.3258 0.037 Uiso 1 1 calc R . .
C112 C 0.28699(11) 1.2881(2) 0.40611(10) 0.0310(5) Uani 1 1 d . . .
H11I H 0.2691 1.3751 0.4136 0.037 Uiso 1 1 calc R . .
C113 C 0.31967(11) 1.1980(2) 0.44691(9) 0.0275(4) Uani 1 1 d . . .
H11F H 0.3248 1.2237 0.4828 0.033 Uiso 1 1 calc R . .
C114 C 0.34523(10) 1.0693(2) 0.43587(8) 0.0213(4) Uani 1 1 d . . .
H11G H 0.3683 1.0091 0.4644 0.026 Uiso 1 1 calc R . .
C115 C 0.42458(9) 0.7388(2) 0.54223(7) 0.0170(3) Uani 1 1 d . . .
C116 C 0.38214(9) 0.8467(2) 0.55115(7) 0.0178(4) Uani 1 1 d . . .
C117 C 0.40876(10) 0.9554(2) 0.58720(8) 0.0207(4) Uani 1 1 d . . .
H11B H 0.3796 1.0271 0.5934 0.025 Uiso 1 1 calc R . .
C118 C 0.47856(10) 0.9557(2) 0.61347(8) 0.0225(4) Uani 1 1 d . . .
H11D H 0.4981 1.0288 0.6379 0.027 Uiso 1 1 calc R . .
C119 C 0.52075(10) 0.8483(2) 0.60424(8) 0.0214(4) Uani 1 1 d . . .
H11C H 0.5686 0.8500 0.6230 0.026 Uiso 1 1 calc R . .
C120 C 0.49526(10) 0.7397(2) 0.56870(7) 0.0205(4) Uani 1 1 d . . .
H12B H 0.5248 0.6686 0.5626 0.025 Uiso 1 1 calc R . .
C121 C 0.67188(12) 0.4151(3) 0.30234(10) 0.0325(5) Uani 1 1 d . . .
H12F H 0.7009 0.4537 0.3367 0.039 Uiso 1 1 calc R . .
H12G H 0.6990 0.4164 0.2766 0.039 Uiso 1 1 calc R . .
C122 C 0.65061(12) 0.2674(3) 0.30998(10) 0.0335(5) Uani 1 1 d . . .
H12C H 0.6223 0.2677 0.3344 0.050 Uiso 1 1 calc R . .
H12D H 0.6918 0.2099 0.3250 0.050 Uiso 1 1 calc R . .
H12E H 0.6238 0.2285 0.2755 0.050 Uiso 1 1 calc R . .
C123 C 0.62561(14) 0.6407(3) 0.28016(11) 0.0376(6) Uani 1 1 d . . .
H12H H 0.6527 0.6563 0.2550 0.045 Uiso 1 1 calc R . .
H12I H 0.6529 0.6751 0.3157 0.045 Uiso 1 1 calc R . .
C124 C 0.55808(15) 0.7184(3) 0.26154(10) 0.0418(6) Uani 1 1 d . . .
H12J H 0.5304 0.6804 0.2272 0.063 Uiso 1 1 calc R . .
H12K H 0.5670 0.8183 0.2575 0.063 Uiso 1 1 calc R . .
H12L H 0.5329 0.7072 0.2878 0.063 Uiso 1 1 calc R . .
 
loop_
 _atom_site_aniso_label
 _atom_site_aniso_U_11
 _atom_site_aniso_U_22
 _atom_site_aniso_U_33
 _atom_site_aniso_U_23
 _atom_site_aniso_U_13
 _atom_site_aniso_U_12
O1 0.0209(7) 0.0306(8) 0.0214(7) 0.0033(6) 0.0093(5) 0.0058(6)
O2 0.0234(7) 0.0262(8) 0.0185(7) -0.0004(6) 0.0067(6) -0.0100(6)
O3 0.0198(7) 0.0318(8) 0.0236(7) -0.0045(6) 0.0086(6) -0.0056(6)
O4 0.0259(7) 0.0249(8) 0.0216(7) 0.0032(6) 0.0061(6) 0.0107(6)
O5 0.0166(6) 0.0349(9) 0.0236(7) 0.0060(6) 0.0030(5) -0.0059(6)
O6 0.0213(7) 0.0321(8) 0.0211(7) -0.0016(6) 0.0043(6) 0.0117(6)
O7 0.0164(7) 0.0334(9) 0.0303(8) -0.0059(7) 0.0050(6) 0.0036(6)
O8 0.0211(7) 0.0253(8) 0.0224(7) 0.0031(6) 0.0063(6) -0.0069(6)
O9 0.0282(8) 0.0292(9) 0.0428(10) -0.0002(7) 0.0064(7) -0.0007(7)
N1 0.0187(7) 0.0172(8) 0.0150(7) -0.0011(6) 0.0045(6) -0.0009(6)
N2 0.0146(7) 0.0144(7) 0.0158(7) -0.0013(6) 0.0041(6) -0.0006(6)
N3 0.0179(7) 0.0181(8) 0.0190(7) 0.0018(6) 0.0050(6) -0.0021(6)
N4 0.0157(7) 0.0150(7) 0.0160(7) 0.0014(6) 0.0031(6) -0.0008(6)
N5 0.0186(7) 0.0167(7) 0.0153(7) 0.0004(6) 0.0049(6) 0.0018(6)
N6 0.0155(7) 0.0136(7) 0.0165(7) -0.0011(6) 0.0047(6) 0.0005(6)
N7 0.0176(7) 0.0170(8) 0.0193(7) 0.0013(6) 0.0057(6) 0.0022(6)
N8 0.0158(7) 0.0150(7) 0.0181(7) 0.0014(6) 0.0058(6) 0.0006(6)
C1 0.0134(8) 0.0215(9) 0.0155(8) 0.0007(7) 0.0026(6) -0.0018(7)
C2 0.0163(8) 0.0187(9) 0.0167(8) -0.0009(7) 0.0051(7) -0.0012(7)
C3 0.0205(9) 0.0146(8) 0.0191(9) -0.0018(7) 0.0043(7) 0.0015(7)
C4 0.0197(9) 0.0149(9) 0.0170(8) 0.0002(7) 0.0030(7) -0.0007(7)
C5 0.0172(8) 0.0178(9) 0.0152(8) 0.0013(7) 0.0037(7) -0.0020(7)
C6 0.0167(8) 0.0148(8) 0.0135(8) -0.0008(6) 0.0045(6) 0.0002(7)
C7 0.0144(8) 0.0149(8) 0.0172(8) 0.0017(7) 0.0049(6) 0.0019(7)
C8 0.0200(9) 0.0152(8) 0.0186(8) 0.0002(7) 0.0055(7) 0.0011(7)
C9 0.0207(9) 0.0235(10) 0.0160(8) 0.0005(7) 0.0075(7) 0.0024(8)
C10 0.0168(8) 0.0237(10) 0.0239(9) 0.0034(8) 0.0079(7) 0.0024(8)
C11 0.0159(9) 0.0209(9) 0.0250(10) -0.0017(8) 0.0049(7) -0.0003(7)
C12 0.0193(9) 0.0190(9) 0.0185(9) -0.0022(7) 0.0056(7) 0.0009(7)
C13 0.0165(8) 0.0157(8) 0.0181(8) 0.0001(7) 0.0078(7) -0.0011(7)
C14 0.0211(9) 0.0169(9) 0.0199(9) 0.0015(7) 0.0076(7) -0.0004(7)
C15 0.0243(10) 0.0212(10) 0.0229(9) 0.0049(8) 0.0071(8) 0.0037(8)
C16 0.0302(10) 0.0175(9) 0.0268(10) 0.0020(8) 0.0144(8) 0.0036(8)
C17 0.0280(10) 0.0206(10) 0.0236(9) -0.0062(8) 0.0128(8) -0.0018(8)
C18 0.0201(9) 0.0203(9) 0.0185(9) -0.0015(7) 0.0081(7) -0.0010(7)
C19 0.0184(8) 0.0163(8) 0.0148(8) 0.0003(7) 0.0026(7) -0.0030(7)
C20 0.0200(9) 0.0188(9) 0.0164(8) -0.0013(7) 0.0028(7) -0.0010(7)
C21 0.0233(10) 0.0226(10) 0.0223(9) 0.0026(8) -0.0021(8) -0.0006(8)
C22 0.0320(11) 0.0317(12) 0.0182(9) 0.0073(8) 0.0020(8) -0.0052(9)
C23 0.0280(10) 0.0328(11) 0.0191(9) 0.0019(8) 0.0083(8) -0.0058(9)
C24 0.0207(9) 0.0232(10) 0.0177(8) -0.0005(7) 0.0050(7) -0.0025(8)
C25 0.0150(8) 0.0177(9) 0.0148(8) -0.0024(7) 0.0014(6) -0.0042(7)
C26 0.0152(8) 0.0217(9) 0.0143(8) -0.0001(7) 0.0035(6) -0.0007(7)
C27 0.0187(9) 0.0229(10) 0.0191(9) 0.0021(8) 0.0042(7) 0.0024(8)
C28 0.0243(9) 0.0235(10) 0.0159(9) 0.0032(7) 0.0042(7) -0.0015(8)
C29 0.0208(9) 0.0253(10) 0.0181(9) -0.0034(8) 0.0073(7) -0.0061(8)
C30 0.0196(9) 0.0196(9) 0.0189(8) -0.0049(7) 0.0057(7) -0.0029(7)
C31 0.0165(8) 0.0206(9) 0.0156(8) 0.0002(7) 0.0034(7) 0.0017(7)
C32 0.0175(8) 0.0178(9) 0.0190(8) 0.0016(7) 0.0053(7) 0.0029(7)
C33 0.0231(9) 0.0186(9) 0.0216(9) 0.0024(7) 0.0033(8) -0.0051(8)
C34 0.0213(9) 0.0154(9) 0.0199(9) 0.0004(7) 0.0027(7) -0.0015(7)
C35 0.0186(9) 0.0167(9) 0.0168(8) -0.0005(7) 0.0043(7) 0.0023(7)
C36 0.0153(8) 0.0159(8) 0.0153(8) 0.0002(7) 0.0033(6) 0.0003(7)
C37 0.0193(9) 0.0169(9) 0.0155(8) 0.0011(7) 0.0037(7) 0.0030(7)
C38 0.0200(9) 0.0197(9) 0.0182(8) 0.0005(7) 0.0029(7) 0.0010(7)
C39 0.0281(10) 0.0241(10) 0.0201(9) -0.0049(8) 0.0012(8) 0.0027(9)
C40 0.0318(11) 0.0299(11) 0.0184(9) -0.0019(8) 0.0075(8) 0.0084(9)
C41 0.0221(9) 0.0320(11) 0.0201(9) 0.0030(8) 0.0078(8) 0.0048(9)
C42 0.0195(9) 0.0234(10) 0.0191(9) 0.0003(8) 0.0042(7) -0.0007(8)
C43 0.0157(8) 0.0172(9) 0.0204(9) -0.0028(7) 0.0031(7) 0.0004(7)
C44 0.0193(9) 0.0211(10) 0.0246(10) -0.0018(8) 0.0060(8) -0.0008(8)
C45 0.0221(10) 0.0260(10) 0.0343(11) -0.0055(9) 0.0131(8) -0.0029(8)
C46 0.0175(9) 0.0371(13) 0.0375(12) -0.0070(10) 0.0049(9) 0.0067(9)
C47 0.0252(11) 0.0419(14) 0.0295(11) 0.0010(10) 0.0005(9) 0.0108(10)
C48 0.0234(10) 0.0281(11) 0.0246(10) 0.0036(9) 0.0072(8) 0.0065(9)
C49 0.0157(8) 0.0161(9) 0.0231(9) -0.0019(7) 0.0067(7) -0.0007(7)
C50 0.0193(9) 0.0190(9) 0.0234(9) -0.0029(7) 0.0047(7) 0.0007(7)
C51 0.0230(10) 0.0228(10) 0.0334(11) -0.0093(9) 0.0047(8) -0.0008(8)
C52 0.0292(11) 0.0190(10) 0.0483(13) -0.0056(10) 0.0150(10) -0.0051(9)
C53 0.0419(13) 0.0195(10) 0.0400(12) 0.0036(9) 0.0211(10) -0.0030(9)
C54 0.0323(11) 0.0198(10) 0.0251(10) 0.0007(8) 0.0119(9) -0.0018(8)
C55 0.0182(8) 0.0192(9) 0.0156(8) 0.0044(7) 0.0034(7) 0.0024(7)
C56 0.0155(8) 0.0204(9) 0.0154(8) 0.0028(7) 0.0030(7) 0.0015(7)
C57 0.0178(9) 0.0229(10) 0.0192(9) 0.0018(7) 0.0029(7) 0.0011(8)
C58 0.0273(10) 0.0236(10) 0.0197(9) 0.0002(8) 0.0075(8) 0.0061(8)
C59 0.0217(9) 0.0303(11) 0.0237(9) 0.0073(8) 0.0115(8) 0.0073(8)
C60 0.0185(9) 0.0241(10) 0.0231(9) 0.0058(8) 0.0075(7) -0.0008(8)
C61 0.0156(8) 0.0242(10) 0.0188(9) 0.0032(7) 0.0075(7) 0.0020(7)
C62 0.0163(8) 0.0206(9) 0.0156(8) 0.0006(7) 0.0045(7) 0.0039(7)
C63 0.0258(10) 0.0148(9) 0.0190(9) -0.0005(7) 0.0085(7) -0.0007(7)
C64 0.0228(9) 0.0138(8) 0.0179(9) -0.0007(7) 0.0076(7) 0.0019(7)
C65 0.0165(8) 0.0169(9) 0.0158(8) 0.0019(7) 0.0053(6) 0.0041(7)
C66 0.0149(8) 0.0141(8) 0.0178(8) -0.0020(7) 0.0041(7) 0.0009(7)
C67 0.0158(8) 0.0151(8) 0.0192(8) 0.0000(7) 0.0050(7) 0.0003(7)
C68 0.0198(9) 0.0163(9) 0.0175(8) 0.0005(7) 0.0060(7) 0.0009(7)
C69 0.0197(9) 0.0192(9) 0.0183(9) 0.0016(7) 0.0032(7) -0.0025(7)
C70 0.0154(8) 0.0239(10) 0.0239(9) 0.0005(8) 0.0045(7) -0.0006(8)
C71 0.0206(9) 0.0317(11) 0.0247(10) -0.0056(8) 0.0097(8) 0.0020(8)
C72 0.0193(9) 0.0298(11) 0.0183(9) -0.0058(8) 0.0047(7) -0.0010(8)
C73 0.0136(8) 0.0142(9) 0.0301(10) -0.0036(7) 0.0029(7) -0.0001(7)
C74 0.0190(9) 0.0176(9) 0.0386(12) 0.0037(8) 0.0072(9) 0.0019(8)
C75 0.0202(10) 0.0188(10) 0.0645(16) 0.0117(11) 0.0064(10) 0.0007(9)
C76 0.0203(10) 0.0150(10) 0.087(2) -0.0005(12) -0.0018(12) -0.0004(9)
C77 0.0244(11) 0.0242(12) 0.0622(17) -0.0189(12) -0.0053(11) 0.0032(9)
C78 0.0201(10) 0.0254(11) 0.0379(12) -0.0120(9) 0.0022(9) 0.0013(9)
C79 0.0185(9) 0.0208(9) 0.0143(8) -0.0015(7) 0.0048(7) 0.0030(7)
C80 0.0200(9) 0.0236(10) 0.0156(8) -0.0019(7) 0.0062(7) 0.0022(8)
C81 0.0326(11) 0.0244(10) 0.0195(9) 0.0015(8) 0.0128(8) 0.0039(9)
C82 0.0311(11) 0.0366(12) 0.0193(9) 0.0069(9) 0.0084(8) 0.0125(10)
C83 0.0228(10) 0.0419(13) 0.0172(9) 0.0003(9) 0.0032(7) 0.0075(9)
C84 0.0202(9) 0.0277(10) 0.0178(9) -0.0011(8) 0.0055(7) 0.0021(8)
C85 0.0184(8) 0.0191(9) 0.0150(8) -0.0003(7) 0.0083(7) 0.0037(7)
C86 0.0153(8) 0.0223(9) 0.0159(8) 0.0025(7) 0.0062(7) 0.0010(7)
C87 0.0206(9) 0.0212(9) 0.0209(9) 0.0032(8) 0.0086(7) -0.0006(8)
C88 0.0208(9) 0.0223(9) 0.0174(9) 0.0044(7) 0.0063(7) 0.0040(8)
C89 0.0174(8) 0.0265(10) 0.0164(8) -0.0021(7) 0.0037(7) 0.0035(8)
C90 0.0186(9) 0.0213(9) 0.0179(8) -0.0020(7) 0.0051(7) -0.0002(7)
C91 0.0168(8) 0.0205(9) 0.0181(8) 0.0002(7) 0.0055(7) -0.0005(7)
C92 0.0158(8) 0.0182(9) 0.0195(8) 0.0004(7) 0.0054(7) -0.0016(7)
C93 0.0228(9) 0.0167(9) 0.0207(9) 0.0016(7) 0.0082(7) 0.0034(7)
C94 0.0215(9) 0.0141(8) 0.0192(9) 0.0000(7) 0.0072(7) 0.0000(7)
C95 0.0174(8) 0.0152(8) 0.0172(8) 0.0007(7) 0.0041(7) -0.0014(7)
C96 0.0158(8) 0.0155(8) 0.0164(8) 0.0014(7) 0.0034(7) 0.0008(7)
C97 0.0172(8) 0.0146(8) 0.0200(8) -0.0020(7) 0.0065(7) -0.0013(7)
C98 0.0200(9) 0.0177(9) 0.0204(9) 0.0012(7) 0.0060(7) -0.0008(7)
C99 0.0174(9) 0.0234(10) 0.0263(10) -0.0017(8) 0.0044(8) 0.0008(8)
C100 0.0203(9) 0.0231(10) 0.0283(10) -0.0048(8) 0.0108(8) -0.0051(8)
C101 0.0265(10) 0.0226(10) 0.0246(10) 0.0003(8) 0.0122(8) -0.0032(8)
C102 0.0225(9) 0.0188(9) 0.0208(9) 0.0021(7) 0.0061(7) 0.0000(7)
C103 0.0213(9) 0.0156(9) 0.0165(8) 0.0013(7) 0.0039(7) -0.0015(7)
C104 0.0221(9) 0.0187(9) 0.0204(9) 0.0010(7) 0.0033(7) 0.0003(8)
C105 0.0207(9) 0.0257(10) 0.0238(9) 0.0031(8) -0.0023(7) -0.0020(8)
C106 0.0354(11) 0.0268(11) 0.0191(9) -0.0002(8) -0.0006(8) -0.0076(9)
C107 0.0369(11) 0.0252(10) 0.0199(9) -0.0025(8) 0.0096(8) -0.0038(9)
C108 0.0231(9) 0.0219(10) 0.0203(9) 0.0006(8) 0.0071(7) -0.0008(8)
C109 0.0134(8) 0.0153(9) 0.0243(9) -0.0002(7) 0.0042(7) -0.0009(7)
C110 0.0223(10) 0.0210(10) 0.0262(10) 0.0006(8) 0.0043(8) 0.0009(8)
C111 0.0255(10) 0.0192(10) 0.0427(13) 0.0048(9) 0.0021(9) 0.0056(9)
C112 0.0237(10) 0.0183(10) 0.0506(14) -0.0078(10) 0.0105(10) 0.0003(8)
C113 0.0256(10) 0.0228(10) 0.0364(11) -0.0109(9) 0.0127(9) -0.0041(8)
C114 0.0203(9) 0.0181(9) 0.0260(10) -0.0018(8) 0.0077(8) -0.0018(8)
C115 0.0187(8) 0.0184(9) 0.0144(8) 0.0028(7) 0.0057(7) -0.0003(7)
C116 0.0151(8) 0.0227(9) 0.0160(8) 0.0023(7) 0.0052(7) 0.0002(7)
C117 0.0219(9) 0.0226(10) 0.0187(9) 0.0001(7) 0.0080(7) 0.0013(8)
C118 0.0233(10) 0.0256(10) 0.0184(9) -0.0012(8) 0.0060(8) -0.0054(8)
C119 0.0151(8) 0.0269(10) 0.0210(9) 0.0062(8) 0.0037(7) -0.0015(8)
C120 0.0178(9) 0.0231(10) 0.0201(9) 0.0059(7) 0.0052(7) 0.0034(7)
C121 0.0243(10) 0.0329(12) 0.0382(12) -0.0007(10) 0.0061(9) -0.0004(9)
C122 0.0263(11) 0.0303(12) 0.0403(13) -0.0037(10) 0.0041(9) 0.0024(9)
C123 0.0396(13) 0.0358(13) 0.0395(13) 0.0057(11) 0.0152(11) -0.0025(11)
C124 0.0539(16) 0.0351(14) 0.0339(12) 0.0026(11) 0.0092(11) 0.0095(12)
 
_geom_special_details
;
 All esds (except the esd in the dihedral angle between two l.s. planes)
 are estimated using the full covariance matrix.  The cell esds are taken
 into account individually in the estimation of esds in distances, angles
 and torsion angles; correlations between esds in cell parameters are only
 used when they are defined by crystal symmetry.  An approximate (isotropic)
 treatment of cell esds is used for estimating esds involving l.s. planes.
;
 
loop_
 _geom_bond_atom_site_label_1
 _geom_bond_atom_site_label_2
 _geom_bond_distance
 _geom_bond_site_symmetry_2
 _geom_bond_publ_flag
O1 C1 1.219(2) . ?
O2 C2 1.398(2) . ?
O3 C31 1.225(2) . ?
O4 C32 1.395(2) . ?
O5 C61 1.224(2) . ?
O6 C62 1.403(2) . ?
O7 C91 1.223(2) . ?
O8 C92 1.396(2) . ?
O9 C123 1.405(3) . ?
O9 C121 1.420(3) . ?
N1 C25 1.395(2) . ?
N1 C2 1.472(2) . ?
N1 C3 1.476(2) . ?
N2 C5 1.462(2) . ?
N2 C4 1.470(2) . ?
N2 C6 1.494(2) . ?
N3 C55 1.393(3) . ?
N3 C32 1.469(2) . ?
N3 C33 1.482(2) . ?
N4 C35 1.462(2) . ?
N4 C34 1.466(2) . ?
N4 C36 1.496(2) . ?
N5 C85 1.392(2) . ?
N5 C62 1.472(2) . ?
N5 C63 1.476(2) . ?
N6 C65 1.468(2) . ?
N6 C64 1.474(2) . ?
N6 C66 1.494(2) . ?
N7 C115 1.388(2) . ?
N7 C92 1.473(2) . ?
N7 C93 1.477(2) . ?
N8 C95 1.459(2) . ?
N8 C94 1.472(2) . ?
N8 C96 1.497(2) . ?
C1 C26 1.466(2) . ?
C1 C2 1.549(3) . ?
C2 C5 1.522(2) . ?
C3 C4 1.514(3) . ?
C4 C5 1.491(3) . ?
C6 C19 1.533(2) . ?
C6 C7 1.540(2) . ?
C6 C13 1.544(3) . ?
C7 C8 1.396(3) . ?
C7 C12 1.397(3) . ?
C8 C9 1.392(3) . ?
C9 C10 1.383(3) . ?
C10 C11 1.392(3) . ?
C11 C12 1.385(3) . ?
C13 C14 1.396(3) . ?
C13 C18 1.396(3) . ?
C14 C15 1.397(3) . ?
C15 C16 1.388(3) . ?
C16 C17 1.390(3) . ?
C17 C18 1.390(3) . ?
C19 C24 1.398(3) . ?
C19 C20 1.400(3) . ?
C20 C21 1.389(3) . ?
C21 C22 1.389(3) . ?
C22 C23 1.386(3) . ?
C23 C24 1.395(3) . ?
C25 C30 1.398(3) . ?
C25 C26 1.404(3) . ?
C26 C27 1.396(3) . ?
C27 C28 1.388(3) . ?
C28 C29 1.402(3) . ?
C29 C30 1.383(3) . ?
C31 C56 1.451(3) . ?
C31 C32 1.540(3) . ?
C32 C35 1.516(3) . ?
C33 C34 1.518(3) . ?
C34 C35 1.491(3) . ?
C36 C37 1.541(3) . ?
C36 C43 1.541(3) . ?
C36 C49 1.545(3) . ?
C37 C42 1.400(3) . ?
C37 C38 1.400(3) . ?
C38 C39 1.392(3) . ?
C39 C40 1.385(3) . ?
C40 C41 1.388(3) . ?
C41 C42 1.387(3) . ?
C43 C44 1.393(3) . ?
C43 C48 1.399(3) . ?
C44 C45 1.400(3) . ?
C45 C46 1.377(3) . ?
C46 C47 1.385(3) . ?
C47 C48 1.389(3) . ?
C49 C50 1.386(3) . ?
C49 C54 1.401(3) . ?
C50 C51 1.397(3) . ?
C51 C52 1.383(3) . ?
C52 C53 1.383(3) . ?
C53 C54 1.389(3) . ?
C55 C60 1.395(3) . ?
C55 C56 1.405(3) . ?
C56 C57 1.400(3) . ?
C57 C58 1.381(3) . ?
C58 C59 1.401(3) . ?
C59 C60 1.390(3) . ?
C61 C86 1.463(3) . ?
C61 C62 1.541(3) . ?
C62 C65 1.524(2) . ?
C63 C64 1.513(3) . ?
C64 C65 1.489(3) . ?
C66 C79 1.535(3) . ?
C66 C73 1.542(3) . ?
C66 C67 1.545(2) . ?
C67 C68 1.392(3) . ?
C67 C72 1.401(3) . ?
C68 C69 1.395(3) . ?
C69 C70 1.384(3) . ?
C70 C71 1.394(3) . ?
C71 C72 1.387(3) . ?
C73 C74 1.391(3) . ?
C73 C78 1.401(3) . ?
C74 C75 1.393(3) . ?
C75 C76 1.377(4) . ?
C76 C77 1.388(4) . ?
C77 C78 1.390(3) . ?
C79 C80 1.400(3) . ?
C79 C84 1.404(3) . ?
C80 C81 1.392(3) . ?
C81 C82 1.390(3) . ?
C82 C83 1.385(3) . ?
C83 C84 1.395(3) . ?
C85 C86 1.398(3) . ?
C85 C90 1.400(3) . ?
C86 C87 1.398(3) . ?
C87 C88 1.387(3) . ?
C88 C89 1.405(3) . ?
C89 C90 1.384(3) . ?
C91 C116 1.453(3) . ?
C91 C92 1.543(3) . ?
C92 C95 1.524(3) . ?
C93 C94 1.519(3) . ?
C94 C95 1.491(3) . ?
C96 C97 1.539(3) . ?
C96 C109 1.541(3) . ?
C96 C103 1.542(3) . ?
C97 C98 1.391(3) . ?
C97 C102 1.402(3) . ?
C98 C99 1.399(3) . ?
C99 C100 1.387(3) . ?
C100 C101 1.388(3) . ?
C101 C102 1.386(3) . ?
C103 C108 1.393(3) . ?
C103 C104 1.403(3) . ?
C104 C105 1.391(3) . ?
C105 C106 1.383(3) . ?
C106 C107 1.391(3) . ?
C107 C108 1.393(3) . ?
C109 C114 1.393(3) . ?
C109 C110 1.401(3) . ?
C110 C111 1.391(3) . ?
C111 C112 1.384(3) . ?
C112 C113 1.380(3) . ?
C113 C114 1.396(3) . ?
C115 C120 1.396(3) . ?
C115 C116 1.405(3) . ?
C116 C117 1.399(3) . ?
C117 C118 1.379(3) . ?
C118 C119 1.401(3) . ?
C119 C120 1.387(3) . ?
C121 C122 1.503(4) . ?
C123 C124 1.507(4) . ?
 
loop_
 _geom_angle_atom_site_label_1
 _geom_angle_atom_site_label_2
 _geom_angle_atom_site_label_3
 _geom_angle
 _geom_angle_site_symmetry_1
 _geom_angle_site_symmetry_3
 _geom_angle_publ_flag
C123 O9 C121 112.55(19) . . ?
C25 N1 C2 107.89(15) . . ?
C25 N1 C3 119.75(15) . . ?
C2 N1 C3 110.30(14) . . ?
C5 N2 C4 61.15(13) . . ?
C5 N2 C6 118.86(14) . . ?
C4 N2 C6 120.38(15) . . ?
C55 N3 C32 108.33(15) . . ?
C55 N3 C33 121.69(16) . . ?
C32 N3 C33 110.05(15) . . ?
C35 N4 C34 61.23(13) . . ?
C35 N4 C36 118.27(14) . . ?
C34 N4 C36 119.44(15) . . ?
C85 N5 C62 108.03(15) . . ?
C85 N5 C63 118.99(15) . . ?
C62 N5 C63 110.46(14) . . ?
C65 N6 C64 60.79(13) . . ?
C65 N6 C66 118.88(14) . . ?
C64 N6 C66 119.01(15) . . ?
C115 N7 C92 108.21(15) . . ?
C115 N7 C93 121.16(16) . . ?
C92 N7 C93 110.11(14) . . ?
C95 N8 C94 61.17(12) . . ?
C95 N8 C96 119.19(14) . . ?
C94 N8 C96 119.98(15) . . ?
O1 C1 C26 130.71(18) . . ?
O1 C1 C2 123.00(17) . . ?
C26 C1 C2 106.28(15) . . ?
O2 C2 N1 114.07(16) . . ?
O2 C2 C5 106.22(15) . . ?
N1 C2 C5 104.09(15) . . ?
O2 C2 C1 112.99(15) . . ?
N1 C2 C1 104.06(14) . . ?
C5 C2 C1 115.29(16) . . ?
N1 C3 C4 104.15(15) . . ?
N2 C4 C5 59.15(12) . . ?
N2 C4 C3 111.58(16) . . ?
C5 C4 C3 108.31(15) . . ?
N2 C5 C4 59.70(12) . . ?
N2 C5 C2 113.67(15) . . ?
C4 C5 C2 107.25(15) . . ?
N2 C6 C19 111.97(15) . . ?
N2 C6 C7 107.24(14) . . ?
C19 C6 C7 110.92(15) . . ?
N2 C6 C13 106.46(14) . . ?
C19 C6 C13 113.19(15) . . ?
C7 C6 C13 106.69(15) . . ?
C8 C7 C12 118.58(17) . . ?
C8 C7 C6 122.00(16) . . ?
C12 C7 C6 119.36(16) . . ?
C9 C8 C7 120.27(18) . . ?
C10 C9 C8 120.62(18) . . ?
C9 C10 C11 119.51(18) . . ?
C12 C11 C10 120.03(18) . . ?
C11 C12 C7 120.95(17) . . ?
C14 C13 C18 118.11(18) . . ?
C14 C13 C6 119.95(17) . . ?
C18 C13 C6 121.84(16) . . ?
C13 C14 C15 121.13(19) . . ?
C16 C15 C14 120.07(19) . . ?
C15 C16 C17 119.16(19) . . ?
C18 C17 C16 120.71(19) . . ?
C17 C18 C13 120.76(18) . . ?
C24 C19 C20 117.78(17) . . ?
C24 C19 C6 121.62(17) . . ?
C20 C19 C6 120.26(16) . . ?
C21 C20 C19 121.19(18) . . ?
C22 C21 C20 120.4(2) . . ?
C23 C22 C21 119.25(19) . . ?
C22 C23 C24 120.4(2) . . ?
C23 C24 C19 120.95(19) . . ?
N1 C25 C30 126.71(18) . . ?
N1 C25 C26 112.88(16) . . ?
C30 C25 C26 120.39(18) . . ?
C27 C26 C25 121.27(17) . . ?
C27 C26 C1 131.54(18) . . ?
C25 C26 C1 107.05(16) . . ?
C28 C27 C26 118.14(19) . . ?
C27 C28 C29 120.37(19) . . ?
C30 C29 C28 121.95(18) . . ?
C29 C30 C25 117.89(18) . . ?
O3 C31 C56 129.95(18) . . ?
O3 C31 C32 123.12(17) . . ?
C56 C31 C32 106.93(16) . . ?
O4 C32 N3 114.63(16) . . ?
O4 C32 C35 104.76(15) . . ?
N3 C32 C35 104.69(15) . . ?
O4 C32 C31 113.50(15) . . ?
N3 C32 C31 103.99(15) . . ?
C35 C32 C31 115.24(16) . . ?
N3 C33 C34 104.24(15) . . ?
N4 C34 C35 59.26(12) . . ?
N4 C34 C33 111.68(17) . . ?
C35 C34 C33 108.20(16) . . ?
N4 C35 C34 59.50(12) . . ?
N4 C35 C32 114.31(15) . . ?
C34 C35 C32 107.31(16) . . ?
N4 C36 C37 112.48(15) . . ?
N4 C36 C43 106.88(14) . . ?
C37 C36 C43 111.50(15) . . ?
N4 C36 C49 106.05(14) . . ?
C37 C36 C49 111.43(15) . . ?
C43 C36 C49 108.20(15) . . ?
C42 C37 C38 117.94(17) . . ?
C42 C37 C36 119.98(17) . . ?
C38 C37 C36 121.83(17) . . ?
C39 C38 C37 120.75(19) . . ?
C40 C39 C38 120.3(2) . . ?
C39 C40 C41 119.66(19) . . ?
C42 C41 C40 120.03(19) . . ?
C41 C42 C37 121.26(19) . . ?
C44 C43 C48 117.92(18) . . ?
C44 C43 C36 122.18(17) . . ?
C48 C43 C36 119.86(17) . . ?
C43 C44 C45 120.71(19) . . ?
C46 C45 C44 120.5(2) . . ?
C45 C46 C47 119.4(2) . . ?
C46 C47 C48 120.4(2) . . ?
C47 C48 C43 121.1(2) . . ?
C50 C49 C54 117.75(19) . . ?
C50 C49 C36 121.32(17) . . ?
C54 C49 C36 120.91(17) . . ?
C49 C50 C51 121.3(2) . . ?
C52 C51 C50 120.3(2) . . ?
C53 C52 C51 119.2(2) . . ?
C52 C53 C54 120.5(2) . . ?
C53 C54 C49 121.0(2) . . ?
N3 C55 C60 127.63(18) . . ?
N3 C55 C56 112.49(16) . . ?
C60 C55 C56 119.85(18) . . ?
C57 C56 C55 121.89(17) . . ?
C57 C56 C31 130.87(18) . . ?
C55 C56 C31 107.22(17) . . ?
C58 C57 C56 118.17(19) . . ?
C57 C58 C59 119.77(19) . . ?
C60 C59 C58 122.75(18) . . ?
C59 C60 C55 117.57(19) . . ?
O5 C61 C86 130.48(19) . . ?
O5 C61 C62 123.04(17) . . ?
C86 C61 C62 106.48(16) . . ?
O6 C62 N5 113.81(16) . . ?
O6 C62 C65 107.57(15) . . ?
N5 C62 C65 104.49(15) . . ?
O6 C62 C61 111.79(15) . . ?
N5 C62 C61 104.00(14) . . ?
C65 C62 C61 115.10(16) . . ?
N5 C63 C64 104.19(15) . . ?
N6 C64 C65 59.40(12) . . ?
N6 C64 C63 112.57(16) . . ?
C65 C64 C63 108.64(15) . . ?
N6 C65 C64 59.81(11) . . ?
N6 C65 C62 113.08(15) . . ?
C64 C65 C62 107.13(15) . . ?
N6 C66 C79 111.71(15) . . ?
N6 C66 C73 107.44(15) . . ?
C79 C66 C73 112.88(15) . . ?
N6 C66 C67 106.57(14) . . ?
C79 C66 C67 112.31(15) . . ?
C73 C66 C67 105.48(15) . . ?
C68 C67 C72 118.42(17) . . ?
C68 C67 C66 122.03(16) . . ?
C72 C67 C66 119.38(16) . . ?
C67 C68 C69 120.64(17) . . ?
C70 C69 C68 120.56(18) . . ?
C69 C70 C71 119.24(18) . . ?
C72 C71 C70 120.26(18) . . ?
C71 C72 C67 120.85(18) . . ?
C74 C73 C78 118.6(2) . . ?
C74 C73 C66 120.03(18) . . ?
C78 C73 C66 121.21(19) . . ?
C73 C74 C75 120.6(2) . . ?
C76 C75 C74 120.4(3) . . ?
C75 C76 C77 119.7(2) . . ?
C76 C77 C78 120.3(2) . . ?
C77 C78 C73 120.4(3) . . ?
C80 C79 C84 117.79(18) . . ?
C80 C79 C66 120.73(16) . . ?
C84 C79 C66 120.99(17) . . ?
C81 C80 C79 121.09(18) . . ?
C82 C81 C80 120.4(2) . . ?
C83 C82 C81 119.2(2) . . ?
C82 C83 C84 120.6(2) . . ?
C83 C84 C79 120.8(2) . . ?
N5 C85 C86 112.87(16) . . ?
N5 C85 C90 126.47(18) . . ?
C86 C85 C90 120.65(18) . . ?
C87 C86 C85 121.33(17) . . ?
C87 C86 C61 131.42(19) . . ?
C85 C86 C61 107.13(17) . . ?
C88 C87 C86 118.16(19) . . ?
C87 C88 C89 120.13(18) . . ?
C90 C89 C88 122.20(18) . . ?
C89 C90 C85 117.52(18) . . ?
O7 C91 C116 130.37(19) . . ?
O7 C91 C92 122.87(17) . . ?
C116 C91 C92 106.76(16) . . ?
O8 C92 N7 114.07(16) . . ?
O8 C92 C95 104.94(15) . . ?
N7 C92 C95 104.27(14) . . ?
O8 C92 C91 113.56(15) . . ?
N7 C92 C91 103.69(15) . . ?
C95 C92 C91 116.24(16) . . ?
N7 C93 C94 104.11(15) . . ?
N8 C94 C95 58.99(12) . . ?
N8 C94 C93 111.67(16) . . ?
C95 C94 C93 108.26(15) . . ?
N8 C95 C94 59.84(12) . . ?
N8 C95 C92 113.33(15) . . ?
C94 C95 C92 107.17(15) . . ?
N8 C96 C97 106.57(14) . . ?
N8 C96 C109 106.14(14) . . ?
C97 C96 C109 108.10(15) . . ?
N8 C96 C103 112.64(15) . . ?
C97 C96 C103 111.06(15) . . ?
C109 C96 C103 112.01(15) . . ?
C98 C97 C102 118.22(17) . . ?
C98 C97 C96 122.47(17) . . ?
C102 C97 C96 119.28(17) . . ?
C97 C98 C99 120.85(18) . . ?
C100 C99 C98 120.22(19) . . ?
C99 C100 C101 119.34(18) . . ?
C102 C101 C100 120.48(19) . . ?
C101 C102 C97 120.87(18) . . ?
C108 C103 C104 118.00(18) . . ?
C108 C103 C96 121.40(17) . . ?
C104 C103 C96 120.46(17) . . ?
C105 C104 C103 120.97(19) . . ?
C106 C105 C104 120.25(19) . . ?
C105 C106 C107 119.57(19) . . ?
C106 C107 C108 120.2(2) . . ?
C103 C108 C107 121.02(19) . . ?
C114 C109 C110 117.84(18) . . ?
C114 C109 C96 120.70(17) . . ?
C110 C109 C96 121.41(17) . . ?
C111 C110 C109 120.7(2) . . ?
C112 C111 C110 120.7(2) . . ?
C113 C112 C111 119.1(2) . . ?
C112 C113 C114 120.5(2) . . ?
C109 C114 C113 121.0(2) . . ?
N7 C115 C120 127.19(18) . . ?
N7 C115 C116 112.55(16) . . ?
C120 C115 C116 120.21(18) . . ?
C117 C116 C115 121.49(17) . . ?
C117 C116 C91 131.33(18) . . ?
C115 C116 C91 107.17(17) . . ?
C118 C117 C116 118.16(19) . . ?
C117 C118 C119 120.17(19) . . ?
C120 C119 C118 122.46(18) . . ?
C119 C120 C115 117.50(18) . . ?
O9 C121 C122 108.13(19) . . ?
O9 C123 C124 108.2(2) . . ?
 
loop_
 _geom_hbond_atom_site_label_D
 _geom_hbond_atom_site_label_H
 _geom_hbond_atom_site_label_A
 _geom_hbond_distance_DH
 _geom_hbond_distance_HA
 _geom_hbond_distance_DA
 _geom_hbond_angle_DHA
 _geom_hbond_site_symmetry_A
O2 H2 O3  0.82(3) 1.92(3) 2.716(2) 163(3) 1_566
O4 H4 O1  0.86(3) 1.98(3) 2.741(2) 147(3) 1_554
O6 H6 O7  0.86(4) 1.86(4) 2.714(2) 170(3) 1_545
O8 H8 O5  0.86(3) 1.90(3) 2.713(2) 157(3) .
 
_diffrn_measured_fraction_theta_max    0.997
_diffrn_reflns_theta_full              28.35
_diffrn_measured_fraction_theta_full   0.997
_refine_diff_density_max    0.527
_refine_diff_density_min   -0.320
_refine_diff_density_rms    0.044

#===END

data_34
 
_audit_creation_method            SHELXL-97
_chemical_name_systematic
;
 ?
;
_chemical_name_common             ?
_chemical_melting_point           ?
_chemical_formula_moiety          '2(C44 H40 N2 O7), C4 H10 O'
_chemical_formula_sum           'C46 H45 N2 O7.50'
_chemical_formula_weight          745.84
_chemical_absolute_configuration  syn
 
loop_
 _atom_type_symbol
 _atom_type_description
 _atom_type_scat_dispersion_real
 _atom_type_scat_dispersion_imag
 _atom_type_scat_source
 'C'  'C'   0.0033   0.0000
 'International Tables Vol C Tables 4.2.6.8 and 6.1.1.4'
 'H'  'H'   0.0000   0.0000
 'International Tables Vol C Tables 4.2.6.8 and 6.1.1.4'
 'N'  'N'   0.0061   0.0000
 'International Tables Vol C Tables 4.2.6.8 and 6.1.1.4'
 'O'  'O'   0.0106   0.0000
 'International Tables Vol C Tables 4.2.6.8 and 6.1.1.4'
 
_symmetry_cell_setting            Orthorhombic
_symmetry_space_group_name_H-M    P2(1)2(1)2(1)
 
loop_
 _symmetry_equiv_pos_as_xyz
 'x, y, z'
 '-x+1/2, -y, z+1/2'
 '-x, y+1/2, -z+1/2'
 'x+1/2, -y+1/2, -z'
 
_cell_length_a                    12.8063(5)
_cell_length_b                    13.3599(5)
_cell_length_c                    48.7876(19)
_cell_angle_alpha                 90.00
_cell_angle_beta                  90.00
_cell_angle_gamma                 90.00
_cell_volume                      8347.1(6)
_cell_formula_units_Z             8
_cell_measurement_temperature     85(2)
_cell_measurement_reflns_used     9252
_cell_measurement_theta_min       2.20
_cell_measurement_theta_max       25.05
 
_exptl_crystal_description        plate
_exptl_crystal_colour             colorless
_exptl_crystal_size_max           0.21
_exptl_crystal_size_mid           0.20
_exptl_crystal_size_min           0.19
_exptl_crystal_density_meas       ?
_exptl_crystal_density_diffrn     1.187
_exptl_crystal_density_method     'not measured'
_exptl_crystal_F_000              3160
_exptl_absorpt_coefficient_mu     0.081
_exptl_absorpt_correction_type    multi-scan
_exptl_absorpt_correction_T_min   0.9833
_exptl_absorpt_correction_T_max   0.9849
_exptl_absorpt_process_details
;
  Blessing, R. Acta Cryst. (1995) A51 33-38.
  Sheldrick, G.  SADABS (Version 2008/1) Bruker AXS area
  detector absorption and other corrections, University of
  Gottingen, Germany 2008.
;
 
 
_exptl_special_details
;
 4895 frames x 30 sec. @ 6.060 cm; 0.5 deg. steps in omage, 0.45 deg. in phi
;
 
_diffrn_ambient_temperature       85(2)
_diffrn_radiation_wavelength      0.71073
_diffrn_radiation_type            MoK\a
_diffrn_radiation_source          'fine-focus sealed tube'
_diffrn_radiation_monochromator   graphite
_diffrn_measurement_device_type   'CCD area detector'
_diffrn_measurement_method        'phi and omega scans'
_diffrn_detector_area_resol_mean  ?
_diffrn_reflns_number             273236
_diffrn_reflns_av_R_equivalents   0.0610
_diffrn_reflns_av_sigmaI/netI     0.0173
_diffrn_reflns_limit_h_min        -16
_diffrn_reflns_limit_h_max        16
_diffrn_reflns_limit_k_min        -16
_diffrn_reflns_limit_k_max        16
_diffrn_reflns_limit_l_min        -60
_diffrn_reflns_limit_l_max        61
_diffrn_reflns_theta_min          1.67
_diffrn_reflns_theta_max          26.40
_reflns_number_total              9411
_reflns_number_gt                 8699
_reflns_threshold_expression      >2sigma(I)
 
_computing_data_collection        'Bruker SMART-APEX'
_computing_cell_refinement        'Bruker SMART'
_computing_data_reduction         'Bruker SAINT'
_computing_structure_solution     'SHELXM (Sheldrick, 2009)'
_computing_structure_refinement   'SHELXL-97 (Sheldrick, 2008)'
_computing_molecular_graphics     'Bruker SHELXTL'
_computing_publication_material   'Bruker SHELXTL'
 
_refine_special_details
;
 There is one di-ethyl ether solvate molecule per two molecules of the
 target structure.  The ether is disordered over two orientations.
 SAMI/DELU/SIMU restraints were employed to maintain chemical sensibility.
 
 Refinement of F^2^ against ALL reflections.  The weighted R-factor wR and
 goodness of fit S are based on F^2^, conventional R-factors R are based
 on F, with F set to zero for negative F^2^. The threshold expression of
 F^2^ > 2sigma(F^2^) is used only for calculating R-factors(gt) etc. and is
 not relevant to the choice of reflections for refinement.  R-factors based
 on F^2^ are statistically about twice as large as those based on F, and R-
 factors based on ALL data will be even larger.
;
 
_refine_ls_structure_factor_coef  Fsqd
_refine_ls_matrix_type            full
_refine_ls_weighting_scheme       calc
_refine_ls_weighting_details
 'calc w=1/[\s^2^(Fo^2^)+(0.0988P)^2^+6.0302P] where P=(Fo^2^+2Fc^2^)/3'
_atom_sites_solution_primary      direct
_atom_sites_solution_secondary    difmap
_atom_sites_solution_hydrogens    geom
_refine_ls_hydrogen_treatment     constr
_refine_ls_extinction_method      none
_refine_ls_extinction_coef        ?
_refine_ls_abs_structure_details
 'Flack H D (1983), Acta Cryst. A39, 876-881'
_refine_ls_number_reflns          9411
_refine_ls_number_parameters      1037
_refine_ls_number_restraints      75
_refine_ls_R_factor_all           0.0667
_refine_ls_R_factor_gt            0.0620
_refine_ls_wR_factor_ref          0.1833
_refine_ls_wR_factor_gt           0.1791
_refine_ls_goodness_of_fit_ref    1.146
_refine_ls_restrained_S_all       1.149
_refine_ls_shift/su_max           0.001
_refine_ls_shift/su_mean          0.000
 
loop_
 _atom_site_label
 _atom_site_type_symbol
 _atom_site_fract_x
 _atom_site_fract_y
 _atom_site_fract_z
 _atom_site_U_iso_or_equiv
 _atom_site_adp_type
 _atom_site_occupancy
 _atom_site_symmetry_multiplicity
 _atom_site_calc_flag
 _atom_site_refinement_flags
 _atom_site_disorder_assembly
 _atom_site_disorder_group
O1 O 1.0662(3) 0.2598(2) 0.80335(6) 0.0369(7) Uani 1 1 d . . .
H1A H 1.0963 0.3131 0.7988 0.055 Uiso 1 1 calc R . .
O2 O 0.9647(2) 0.4282(2) 0.79133(5) 0.0307(6) Uani 1 1 d . . .
O3 O 0.8427(3) 0.4415(2) 0.82324(6) 0.0402(8) Uani 1 1 d . . .
O4 O 0.9534(3) 0.5682(2) 0.81636(6) 0.0448(8) Uani 1 1 d . . .
O5 O 0.7267(2) 0.4552(2) 0.76600(6) 0.0337(7) Uani 1 1 d . . .
O6 O 0.6996(2) 0.3395(2) 0.66614(6) 0.0361(7) Uani 1 1 d . . .
O7 O 0.8258(2) 0.2199(2) 0.66429(6) 0.0360(7) Uani 1 1 d . . .
O8 O 0.1394(2) 0.6876(2) 0.95022(6) 0.0353(7) Uani 1 1 d . . .
H8A H 0.0850 0.6572 0.9551 0.053 Uiso 1 1 calc R . .
O9 O -0.0376(2) 0.7855(3) 0.95781(6) 0.0374(7) Uani 1 1 d . . .
O10 O -0.0313(2) 0.8854(3) 0.92153(6) 0.0371(7) Uani 1 1 d . . .
O11 O -0.1581(2) 0.7704(3) 0.92498(6) 0.0449(8) Uani 1 1 d . . .
O12 O -0.0763(2) 1.0173(3) 0.98107(6) 0.0434(8) Uani 1 1 d . . .
O13 O 0.0198(3) 1.0581(3) 1.08167(6) 0.0438(8) Uani 1 1 d . . .
O14 O 0.1409(2) 0.9374(2) 1.08795(5) 0.0351(7) Uani 1 1 d . . .
N1 N 0.8611(2) 0.1013(2) 0.77604(7) 0.0261(7) Uani 1 1 d . . .
N2 N 1.0021(3) 0.2327(2) 0.75773(6) 0.0268(7) Uani 1 1 d . . .
N3 N 0.2965(3) 0.8904(3) 0.97721(6) 0.0276(7) Uani 1 1 d . . .
N4 N 0.1576(3) 0.7565(3) 0.99552(6) 0.0285(7) Uani 1 1 d . . .
C1 C 0.7835(3) 0.0232(3) 0.78360(8) 0.0266(8) Uani 1 1 d . . .
C2 C 0.6781(3) 0.0729(3) 0.78988(9) 0.0323(9) Uani 1 1 d . . .
C3 C 0.6560(3) 0.1696(3) 0.78207(8) 0.0323(9) Uani 1 1 d . . .
H3A H 0.7074 0.2078 0.7727 0.039 Uiso 1 1 calc R . .
C4 C 0.5595(4) 0.2120(4) 0.78772(10) 0.0406(10) Uani 1 1 d . . .
H4A H 0.5460 0.2792 0.7824 0.049 Uiso 1 1 calc R . .
C5 C 0.4828(4) 0.1579(4) 0.80097(11) 0.0501(13) Uani 1 1 d . . .
H5A H 0.4178 0.1881 0.8054 0.060 Uiso 1 1 calc R . .
C6 C 0.5022(4) 0.0578(4) 0.80771(12) 0.0540(14) Uani 1 1 d . . .
H6A H 0.4490 0.0182 0.8159 0.065 Uiso 1 1 calc R . .
C7 C 0.5991(4) 0.0171(4) 0.80246(11) 0.0472(12) Uani 1 1 d . . .
H7A H 0.6124 -0.0504 0.8075 0.057 Uiso 1 1 calc R . .
C8 C 0.8183(3) -0.0417(3) 0.80834(8) 0.0255(8) Uani 1 1 d . . .
C9 C 0.8002(4) -0.0067(3) 0.83494(8) 0.0345(9) Uani 1 1 d . . .
H9A H 0.7668 0.0561 0.8374 0.041 Uiso 1 1 calc R . .
C10 C 0.8299(4) -0.0618(3) 0.85778(9) 0.0361(9) Uani 1 1 d . . .
H10A H 0.8167 -0.0366 0.8757 0.043 Uiso 1 1 calc R . .
C11 C 0.8789(3) -0.1535(3) 0.85445(8) 0.0301(8) Uani 1 1 d . . .
H11A H 0.8975 -0.1925 0.8700 0.036 Uiso 1 1 calc R . .
C12 C 0.9004(3) -0.1877(3) 0.82829(8) 0.0266(8) Uani 1 1 d . . .
H12A H 0.9359 -0.2495 0.8259 0.032 Uiso 1 1 calc R . .
C13 C 0.8705(3) -0.1319(3) 0.80525(8) 0.0248(7) Uani 1 1 d . . .
H13A H 0.8861 -0.1561 0.7874 0.030 Uiso 1 1 calc R . .
C14 C 0.7648(3) -0.0372(3) 0.75703(8) 0.0275(8) Uani 1 1 d . . .
C15 C 0.7143(3) -0.1294(3) 0.75757(9) 0.0359(9) Uani 1 1 d . . .
H15A H 0.6968 -0.1585 0.7747 0.043 Uiso 1 1 calc R . .
C16 C 0.6893(4) -0.1789(4) 0.73409(10) 0.0417(11) Uani 1 1 d . . .
H16A H 0.6551 -0.2420 0.7351 0.050 Uiso 1 1 calc R . .
C17 C 0.7131(4) -0.1385(4) 0.70872(10) 0.0401(10) Uani 1 1 d . . .
H17A H 0.6958 -0.1729 0.6923 0.048 Uiso 1 1 calc R . .
C18 C 0.7628(3) -0.0469(3) 0.70793(9) 0.0344(9) Uani 1 1 d . . .
H18A H 0.7795 -0.0178 0.6907 0.041 Uiso 1 1 calc R . .
C19 C 0.7886(3) 0.0031(3) 0.73174(8) 0.0301(8) Uani 1 1 d . . .
H19A H 0.8230 0.0660 0.7307 0.036 Uiso 1 1 calc R . .
C20 C 0.9718(3) 0.0711(3) 0.77526(8) 0.0274(8) Uani 1 1 d . . .
H20A H 0.9933 0.0019 0.7807 0.033 Uiso 1 1 calc R . .
C21 C 1.0314(3) 0.1273(3) 0.75363(8) 0.0264(8) Uani 1 1 d . . .
H21A H 1.1075 0.1180 0.7560 0.032 Uiso 1 1 calc R . .
H21B H 1.0113 0.1043 0.7351 0.032 Uiso 1 1 calc R . .
C22 C 0.9779(3) 0.2462(3) 0.78725(8) 0.0271(8) Uani 1 1 d . . .
C23 C 0.9337(3) 0.1439(3) 0.79615(8) 0.0284(8) Uani 1 1 d . . .
H23A H 0.9294 0.1252 0.8160 0.034 Uiso 1 1 calc R . .
C24 C 0.9020(3) 0.3374(3) 0.78770(8) 0.0276(8) Uani 1 1 d . . .
C25 C 0.8296(4) 0.3415(3) 0.81251(8) 0.0346(9) Uani 1 1 d . . .
H25A H 0.7562 0.3296 0.8070 0.042 Uiso 1 1 calc R . .
H25B H 0.8499 0.2908 0.8263 0.042 Uiso 1 1 calc R . .
C26 C 0.9226(4) 0.4867(3) 0.81085(8) 0.0352(9) Uani 1 1 d . . .
C27 C 0.8584(3) 0.3374(3) 0.75932(7) 0.0269(8) Uani 1 1 d . . .
C28 C 0.9173(3) 0.2721(3) 0.74325(7) 0.0244(7) Uani 1 1 d . . .
C29 C 0.8917(3) 0.2555(3) 0.71595(7) 0.0256(7) Uani 1 1 d . . .
H29A H 0.9306 0.2107 0.7048 0.031 Uiso 1 1 calc R . .
C30 C 0.8059(3) 0.3080(3) 0.70573(8) 0.0283(8) Uani 1 1 d . . .
C31 C 0.7487(3) 0.3765(3) 0.72119(8) 0.0299(8) Uani 1 1 d . . .
H31A H 0.6922 0.4122 0.7132 0.036 Uiso 1 1 calc R . .
C32 C 0.7761(3) 0.3915(3) 0.74856(8) 0.0287(8) Uani 1 1 d . . .
C33 C 0.6421(3) 0.5121(3) 0.75495(9) 0.0345(9) Uani 1 1 d . . .
H33A H 0.5859 0.4664 0.7488 0.041 Uiso 1 1 calc R . .
H33B H 0.6665 0.5507 0.7389 0.041 Uiso 1 1 calc R . .
C34 C 0.6006(3) 0.5820(3) 0.77621(9) 0.0329(9) Uani 1 1 d . . .
C35 C 0.4924(4) 0.5949(4) 0.77842(10) 0.0407(10) Uani 1 1 d . . .
H35A H 0.4465 0.5558 0.7675 0.049 Uiso 1 1 calc R . .
C36 C 0.4527(4) 0.6651(4) 0.79661(10) 0.0439(11) Uani 1 1 d . . .
H36A H 0.3792 0.6739 0.7980 0.053 Uiso 1 1 calc R . .
C37 C 0.5189(4) 0.7227(3) 0.81278(9) 0.0350(9) Uani 1 1 d . . .
H37A H 0.4911 0.7716 0.8249 0.042 Uiso 1 1 calc R . .
C38 C 0.6256(3) 0.7081(3) 0.81108(9) 0.0327(9) Uani 1 1 d . . .
H38A H 0.6713 0.7456 0.8225 0.039 Uiso 1 1 calc R . .
C39 C 0.6663(3) 0.6390(3) 0.79274(9) 0.0324(9) Uani 1 1 d . . .
H39A H 0.7398 0.6304 0.7915 0.039 Uiso 1 1 calc R . .
C40 C 0.7700(3) 0.2924(3) 0.67645(8) 0.0310(9) Uani 1 1 d . . .
C41 C 0.8083(4) 0.1948(4) 0.63504(9) 0.0421(11) Uani 1 1 d . . .
C42 C 0.8897(5) 0.1149(5) 0.63031(11) 0.0601(16) Uani 1 1 d . . .
H42A H 0.9594 0.1437 0.6326 0.090 Uiso 1 1 calc R . .
H42B H 0.8826 0.0885 0.6117 0.090 Uiso 1 1 calc R . .
H42C H 0.8797 0.0605 0.6435 0.090 Uiso 1 1 calc R . .
C43 C 0.6979(4) 0.1513(5) 0.63149(11) 0.0523(13) Uani 1 1 d . . .
H43A H 0.6461 0.2043 0.6343 0.079 Uiso 1 1 calc R . .
H43B H 0.6868 0.0979 0.6450 0.079 Uiso 1 1 calc R . .
H43C H 0.6906 0.1238 0.6130 0.079 Uiso 1 1 calc R . .
C44 C 0.8283(4) 0.2846(5) 0.61733(9) 0.0478(12) Uani 1 1 d . . .
H44A H 0.7744 0.3352 0.6207 0.072 Uiso 1 1 calc R . .
H44B H 0.8265 0.2647 0.5980 0.072 Uiso 1 1 calc R . .
H44C H 0.8971 0.3126 0.6217 0.072 Uiso 1 1 calc R . .
C45 C 0.3772(3) 0.9652(3) 0.96928(8) 0.0308(8) Uani 1 1 d . . .
C46 C 0.4431(3) 0.9309(3) 0.94466(8) 0.0289(8) Uani 1 1 d . . .
C47 C 0.4034(3) 0.9445(3) 0.91817(8) 0.0361(9) Uani 1 1 d . . .
H47A H 0.3384 0.9778 0.9159 0.043 Uiso 1 1 calc R . .
C48 C 0.4558(4) 0.9109(4) 0.89518(9) 0.0412(10) Uani 1 1 d . . .
H48A H 0.4266 0.9202 0.8775 0.049 Uiso 1 1 calc R . .
C49 C 0.5518(4) 0.8634(3) 0.89823(9) 0.0384(10) Uani 1 1 d . . .
H49A H 0.5895 0.8416 0.8826 0.046 Uiso 1 1 calc R . .
C50 C 0.5920(3) 0.8479(3) 0.92430(10) 0.0389(10) Uani 1 1 d . . .
H50A H 0.6571 0.8147 0.9265 0.047 Uiso 1 1 calc R . .
C51 C 0.5373(3) 0.8808(3) 0.94729(9) 0.0327(9) Uani 1 1 d . . .
H51A H 0.5650 0.8687 0.9650 0.039 Uiso 1 1 calc R . .
C52 C 0.4395(3) 0.9856(3) 0.99560(9) 0.0325(9) Uani 1 1 d . . .
C53 C 0.5341(4) 1.0359(4) 0.99477(11) 0.0534(14) Uani 1 1 d . . .
H53A H 0.5643 1.0526 0.9776 0.064 Uiso 1 1 calc R . .
C54 C 0.5850(5) 1.0620(5) 1.01872(11) 0.0690(19) Uani 1 1 d . . .
H54A H 0.6493 1.0972 1.0177 0.083 Uiso 1 1 calc R . .
C55 C 0.5437(5) 1.0377(4) 1.04424(11) 0.0538(14) Uani 1 1 d . . .
H55A H 0.5803 1.0538 1.0606 0.065 Uiso 1 1 calc R . .
C56 C 0.4485(4) 0.9898(3) 1.04527(9) 0.0386(10) Uani 1 1 d . . .
H56A H 0.4181 0.9742 1.0625 0.046 Uiso 1 1 calc R . .
C57 C 0.3972(3) 0.9644(3) 1.02142(8) 0.0323(9) Uani 1 1 d . . .
H57A H 0.3314 0.9317 1.0225 0.039 Uiso 1 1 calc R . .
C58 C 0.3227(4) 1.0646(3) 0.96260(9) 0.0404(11) Uani 1 1 d . . .
C59 C 0.3785(6) 1.1410(4) 0.94956(12) 0.0653(18) Uani 1 1 d . . .
H59A H 0.4495 1.1294 0.9449 0.078 Uiso 1 1 calc R . .
C60 C 0.3354(7) 1.2317(4) 0.94329(13) 0.081(2) Uani 1 1 d . . .
H60A H 0.3764 1.2827 0.9350 0.097 Uiso 1 1 calc R . .
C61 C 0.2319(7) 1.2482(5) 0.94907(12) 0.075(2) Uani 1 1 d . . .
H61A H 0.1994 1.3090 0.9436 0.090 Uiso 1 1 calc R . .
C62 C 0.1749(5) 1.1756(5) 0.96289(13) 0.0627(16) Uani 1 1 d . . .
H62A H 0.1042 1.1882 0.9677 0.075 Uiso 1 1 calc R . .
C63 C 0.2206(4) 1.0842(3) 0.96980(10) 0.0421(11) Uani 1 1 d . . .
H63A H 0.1812 1.0354 0.9795 0.051 Uiso 1 1 calc R . .
C64 C 0.2573(3) 0.8155(3) 0.95804(8) 0.0282(8) Uani 1 1 d . . .
H64A H 0.2810 0.8154 0.9385 0.034 Uiso 1 1 calc R . .
C65 C 0.1498(3) 0.7753(3) 0.96567(8) 0.0295(8) Uani 1 1 d . . .
C66 C 0.2672(3) 0.7315(3) 1.00208(8) 0.0295(8) Uani 1 1 d . . .
H66A H 0.2790 0.6584 1.0012 0.035 Uiso 1 1 calc R . .
H66B H 0.2863 0.7557 1.0206 0.035 Uiso 1 1 calc R . .
C67 C 0.3294(3) 0.7854(3) 0.98021(8) 0.0277(8) Uani 1 1 d . . .
H67A H 0.4028 0.7649 0.9760 0.033 Uiso 1 1 calc R . .
C68 C 0.0544(3) 0.8464(4) 0.96293(8) 0.0314(9) Uani 1 1 d . . .
C69 C 0.0556(3) 0.9176(4) 0.93798(8) 0.0332(9) Uani 1 1 d . . .
H69A H 0.0468 0.9881 0.9438 0.040 Uiso 1 1 calc R . .
H69B H 0.1220 0.9114 0.9277 0.040 Uiso 1 1 calc R . .
C70 C -0.0823(3) 0.8110(4) 0.93382(8) 0.0352(9) Uani 1 1 d . . .
C71 C 0.0463(3) 0.8915(4) 0.99090(8) 0.0333(9) Uani 1 1 d . . .
C72 C -0.0135(3) 0.9717(4) 1.00014(8) 0.0364(10) Uani 1 1 d . . .
C73 C -0.0053(3) 1.0008(4) 1.02742(8) 0.0368(10) Uani 1 1 d . . .
H73A H -0.0454 1.0552 1.0342 0.044 Uiso 1 1 calc R . .
C74 C 0.0629(3) 0.9490(3) 1.04472(8) 0.0317(9) Uani 1 1 d . . .
C75 C 0.1208(3) 0.8667(3) 1.03592(8) 0.0301(8) Uani 1 1 d . . .
H75A H 0.1657 0.8316 1.0481 0.036 Uiso 1 1 calc R . .
C76 C 0.1106(3) 0.8380(3) 1.00874(8) 0.0289(8) Uani 1 1 d . . .
C77 C -0.1311(4) 1.1045(5) 0.99039(10) 0.0596(16) Uani 1 1 d . . .
H77A H -0.0807 1.1580 0.9950 0.072 Uiso 1 1 calc R . .
H77B H -0.1716 1.0882 1.0071 0.072 Uiso 1 1 calc R . .
C78 C -0.2032(4) 1.1396(5) 0.96829(10) 0.0506(13) Uani 1 1 d . . .
C79 C -0.2335(5) 1.2394(5) 0.96925(12) 0.0613(16) Uani 1 1 d . . .
H79A H -0.2039 1.2829 0.9826 0.074 Uiso 1 1 calc R . .
C80 C -0.3070(5) 1.2758(6) 0.95086(13) 0.0656(17) Uani 1 1 d . . .
H80A H -0.3288 1.3436 0.9519 0.079 Uiso 1 1 calc R . .
C81 C -0.3481(4) 1.2136(5) 0.93123(12) 0.0607(17) Uani 1 1 d . . .
H81A H -0.3988 1.2388 0.9188 0.073 Uiso 1 1 calc R . .
C82 C -0.3165(4) 1.1144(5) 0.92933(12) 0.0559(15) Uani 1 1 d . . .
H82A H -0.3442 1.0720 0.9155 0.067 Uiso 1 1 calc R . .
C83 C -0.2432(4) 1.0778(5) 0.94807(11) 0.0535(14) Uani 1 1 d . . .
H83A H -0.2208 1.0102 0.9469 0.064 Uiso 1 1 calc R . .
C84 C 0.0706(3) 0.9886(3) 1.07357(8) 0.0332(9) Uani 1 1 d . . .
C85 C 0.1685(4) 0.9674(3) 1.11632(8) 0.0365(10) Uani 1 1 d . . .
C86 C 0.2511(4) 0.8905(4) 1.12387(9) 0.0408(11) Uani 1 1 d . . .
H86A H 0.2196 0.8237 1.1242 0.061 Uiso 1 1 calc R . .
H86B H 0.2796 0.9063 1.1420 0.061 Uiso 1 1 calc R . .
H86C H 0.3073 0.8921 1.1103 0.061 Uiso 1 1 calc R . .
C87 C 0.2158(5) 1.0702(4) 1.11519(11) 0.0604(16) Uani 1 1 d . . .
H87A H 0.1620 1.1189 1.1100 0.091 Uiso 1 1 calc R . .
H87B H 0.2720 1.0712 1.1016 0.091 Uiso 1 1 calc R . .
H87C H 0.2442 1.0876 1.1332 0.091 Uiso 1 1 calc R . .
C88 C 0.0735(5) 0.9589(5) 1.13466(10) 0.0563(15) Uani 1 1 d . . .
H88A H 0.0472 0.8900 1.1342 0.084 Uiso 1 1 calc R . .
H88B H 0.0191 1.0046 1.1282 0.084 Uiso 1 1 calc R . .
H88C H 0.0928 0.9764 1.1535 0.084 Uiso 1 1 calc R . .
O16 O 0.9794(5) 0.6314(5) 0.63120(12) 0.0515(16) Uani 0.572(5) 1 d PDU A 1
C93 C 1.0252(8) 0.6458(8) 0.60470(16) 0.051(2) Uani 0.572(5) 1 d PDU A 1
H93A H 0.9731 0.6695 0.5912 0.061 Uiso 0.572(5) 1 calc PR A 1
H93B H 1.0582 0.5836 0.5978 0.061 Uiso 0.572(5) 1 calc PR A 1
C94 C 1.1026(8) 0.7222(9) 0.6107(2) 0.064(3) Uani 0.572(5) 1 d PDU A 1
H94A H 1.0734 0.7706 0.6237 0.096 Uiso 0.572(5) 1 calc PR A 1
H94B H 1.1218 0.7568 0.5937 0.096 Uiso 0.572(5) 1 calc PR A 1
H94C H 1.1647 0.6909 0.6187 0.096 Uiso 0.572(5) 1 calc PR A 1
C95 C 0.8956(9) 0.5670(7) 0.62996(19) 0.057(2) Uani 0.572(5) 1 d PDU A 1
H95A H 0.9171 0.5031 0.6214 0.068 Uiso 0.572(5) 1 calc PR A 1
H95B H 0.8394 0.5968 0.6187 0.068 Uiso 0.572(5) 1 calc PR A 1
C96 C 0.8540(7) 0.5469(6) 0.66024(17) 0.050(2) Uani 0.572(5) 1 d PDU A 1
H96A H 0.8963 0.4946 0.6689 0.075 Uiso 0.572(5) 1 calc PR A 1
H96B H 0.7809 0.5252 0.6595 0.075 Uiso 0.572(5) 1 calc PR A 1
H96C H 0.8591 0.6086 0.6710 0.075 Uiso 0.572(5) 1 calc PR A 1
O15 O 0.6673(10) 0.7572(9) 0.63075(18) 0.083(3) Uani 0.428(5) 1 d PDU A 2
C89 C 0.7132(13) 0.8528(10) 0.6289(2) 0.075(4) Uani 0.428(5) 1 d PDU A 2
H89A H 0.6910 0.8948 0.6446 0.090 Uiso 0.428(5) 1 calc PR A 2
H89B H 0.6911 0.8863 0.6118 0.090 Uiso 0.428(5) 1 calc PR A 2
C90 C 0.8297(14) 0.8397(12) 0.6292(3) 0.086(4) Uani 0.428(5) 1 d PDU A 2
H90A H 0.8506 0.8060 0.6462 0.129 Uiso 0.428(5) 1 calc PR A 2
H90B H 0.8635 0.9054 0.6282 0.129 Uiso 0.428(5) 1 calc PR A 2
H90C H 0.8509 0.7990 0.6134 0.129 Uiso 0.428(5) 1 calc PR A 2
C91 C 0.5660(11) 0.7702(7) 0.63266(18) 0.057(3) Uani 0.428(5) 1 d PDU A 2
H91A H 0.5418 0.8181 0.6185 0.068 Uiso 0.428(5) 1 calc PR A 2
H91B H 0.5478 0.7972 0.6509 0.068 Uiso 0.428(5) 1 calc PR A 2
C92 C 0.5137(4) 0.6668(4) 0.62834(18) 0.080(5) Uani 0.428(5) 1 d PDU A 2
H92A H 0.5112 0.6515 0.6087 0.120 Uiso 0.428(5) 1 calc PR A 2
H92B H 0.4426 0.6682 0.6357 0.120 Uiso 0.428(5) 1 calc PR A 2
H92C H 0.5544 0.6152 0.6378 0.120 Uiso 0.428(5) 1 calc PR A 2
 
loop_
 _atom_site_aniso_label
 _atom_site_aniso_U_11
 _atom_site_aniso_U_22
 _atom_site_aniso_U_33
 _atom_site_aniso_U_23
 _atom_site_aniso_U_13
 _atom_site_aniso_U_12
O1 0.0450(17) 0.0294(14) 0.0362(15) 0.0016(12) -0.0099(14) -0.0040(14)
O2 0.0422(16) 0.0232(13) 0.0265(13) -0.0011(11) 0.0058(12) -0.0038(12)
O3 0.063(2) 0.0263(14) 0.0314(14) -0.0045(12) 0.0163(15) -0.0058(15)
O4 0.070(2) 0.0295(15) 0.0345(15) -0.0060(13) 0.0069(16) -0.0105(16)
O5 0.0424(17) 0.0269(13) 0.0319(14) -0.0008(11) 0.0087(13) 0.0083(13)
O6 0.0309(15) 0.0421(17) 0.0354(15) 0.0053(13) -0.0015(12) -0.0052(14)
O7 0.0362(16) 0.0477(17) 0.0242(13) -0.0038(12) 0.0010(12) -0.0001(14)
O8 0.0272(14) 0.0476(17) 0.0310(14) -0.0045(13) 0.0004(12) -0.0050(13)
O9 0.0220(13) 0.063(2) 0.0276(14) 0.0037(14) -0.0014(11) -0.0042(14)
O10 0.0303(14) 0.0518(18) 0.0292(14) 0.0009(13) -0.0070(12) 0.0059(14)
O11 0.0298(16) 0.067(2) 0.0382(16) -0.0087(16) -0.0100(13) -0.0002(16)
O12 0.0344(16) 0.069(2) 0.0270(14) 0.0070(14) -0.0010(12) 0.0239(16)
O13 0.0536(19) 0.0509(19) 0.0268(14) -0.0002(14) 0.0017(14) 0.0113(17)
O14 0.0386(16) 0.0429(16) 0.0237(13) -0.0027(12) -0.0044(12) 0.0046(14)
N1 0.0245(16) 0.0251(15) 0.0288(16) 0.0024(13) 0.0019(13) 0.0017(13)
N2 0.0332(17) 0.0222(15) 0.0249(15) 0.0003(12) 0.0019(14) -0.0032(14)
N3 0.0272(16) 0.0303(16) 0.0255(15) 0.0036(13) 0.0008(13) 0.0020(14)
N4 0.0217(16) 0.0378(17) 0.0259(16) -0.0006(14) -0.0025(13) 0.0002(14)
C1 0.0226(17) 0.0246(17) 0.0327(19) 0.0046(15) 0.0045(15) 0.0016(15)
C2 0.028(2) 0.032(2) 0.037(2) 0.0069(17) 0.0052(17) 0.0059(17)
C3 0.029(2) 0.033(2) 0.035(2) 0.0046(17) 0.0008(16) 0.0052(17)
C4 0.040(2) 0.038(2) 0.044(2) 0.007(2) -0.001(2) 0.013(2)
C5 0.035(2) 0.062(3) 0.054(3) 0.018(3) 0.013(2) 0.024(2)
C6 0.034(2) 0.059(3) 0.069(3) 0.032(3) 0.019(2) 0.014(2)
C7 0.035(2) 0.041(2) 0.065(3) 0.024(2) 0.016(2) 0.012(2)
C8 0.0205(17) 0.0264(18) 0.0296(18) 0.0020(15) 0.0036(15) 0.0001(15)
C9 0.044(2) 0.0258(19) 0.034(2) 0.0005(16) 0.0100(18) 0.0069(18)
C10 0.045(2) 0.032(2) 0.031(2) -0.0016(17) 0.0077(18) 0.0020(19)
C11 0.0266(19) 0.034(2) 0.0299(19) 0.0057(16) -0.0017(15) -0.0011(17)
C12 0.0190(17) 0.0249(18) 0.036(2) 0.0027(15) -0.0002(15) 0.0016(15)
C13 0.0205(17) 0.0263(18) 0.0276(18) 0.0039(15) 0.0007(14) -0.0013(15)
C14 0.0184(17) 0.0315(19) 0.0327(19) 0.0065(16) -0.0015(15) 0.0014(15)
C15 0.033(2) 0.038(2) 0.037(2) 0.0112(19) -0.0085(18) -0.0069(18)
C16 0.040(2) 0.036(2) 0.048(2) 0.010(2) -0.014(2) -0.020(2)
C17 0.042(2) 0.039(2) 0.039(2) 0.0024(19) -0.0139(19) -0.011(2)
C18 0.033(2) 0.037(2) 0.033(2) 0.0074(18) -0.0060(17) -0.0065(18)
C19 0.0265(19) 0.0260(19) 0.038(2) 0.0044(16) 0.0006(16) -0.0051(16)
C20 0.0249(18) 0.0264(18) 0.0310(19) 0.0022(16) -0.0016(15) 0.0004(15)
C21 0.0257(18) 0.0227(17) 0.0309(18) -0.0035(15) 0.0027(15) -0.0010(15)
C22 0.035(2) 0.0221(17) 0.0238(17) -0.0015(15) 0.0007(16) -0.0012(16)
C23 0.035(2) 0.0227(17) 0.0270(18) 0.0008(15) 0.0012(16) 0.0007(16)
C24 0.036(2) 0.0234(17) 0.0233(17) 0.0026(14) 0.0050(16) -0.0014(16)
C25 0.052(3) 0.0242(19) 0.0279(19) -0.0033(15) 0.0107(18) -0.0071(19)
C26 0.051(3) 0.028(2) 0.0259(18) -0.0012(16) 0.0035(18) -0.001(2)
C27 0.036(2) 0.0241(17) 0.0205(17) 0.0017(14) 0.0061(15) -0.0039(16)
C28 0.0272(19) 0.0202(16) 0.0257(17) 0.0002(14) 0.0049(15) -0.0046(15)
C29 0.0294(19) 0.0250(17) 0.0225(16) -0.0011(14) 0.0058(15) -0.0051(16)
C30 0.033(2) 0.0272(18) 0.0244(17) 0.0031(15) 0.0057(16) -0.0059(16)
C31 0.032(2) 0.0260(18) 0.032(2) 0.0081(16) 0.0030(16) 0.0013(16)
C32 0.033(2) 0.0235(17) 0.0295(19) 0.0016(15) 0.0078(16) -0.0015(16)
C33 0.037(2) 0.0303(19) 0.036(2) 0.0025(17) 0.0033(18) 0.0090(18)
C34 0.032(2) 0.0299(19) 0.037(2) 0.0074(17) 0.0098(18) 0.0070(17)
C35 0.032(2) 0.044(2) 0.047(2) -0.006(2) 0.0009(19) 0.004(2)
C36 0.030(2) 0.045(3) 0.057(3) -0.008(2) 0.004(2) 0.009(2)
C37 0.040(2) 0.0269(19) 0.038(2) 0.0036(17) 0.0094(19) 0.0087(18)
C38 0.035(2) 0.0285(19) 0.035(2) 0.0059(17) 0.0032(17) -0.0013(17)
C39 0.029(2) 0.031(2) 0.037(2) 0.0080(17) 0.0083(17) 0.0018(17)
C40 0.030(2) 0.033(2) 0.0302(19) 0.0043(17) 0.0028(16) -0.0078(18)
C41 0.039(2) 0.060(3) 0.027(2) -0.009(2) -0.0019(18) -0.003(2)
C42 0.059(3) 0.084(4) 0.037(3) -0.021(3) 0.000(2) 0.013(3)
C43 0.048(3) 0.061(3) 0.048(3) -0.010(3) -0.001(2) -0.014(3)
C44 0.039(2) 0.079(4) 0.026(2) 0.003(2) -0.0021(18) -0.011(3)
C45 0.032(2) 0.0283(19) 0.0316(19) 0.0049(16) 0.0047(16) 0.0028(17)
C46 0.0289(19) 0.0240(18) 0.034(2) 0.0024(15) 0.0031(16) -0.0014(16)
C47 0.036(2) 0.039(2) 0.033(2) 0.0069(18) 0.0073(18) 0.0092(19)
C48 0.041(2) 0.047(3) 0.035(2) 0.003(2) 0.0055(19) 0.007(2)
C49 0.042(2) 0.035(2) 0.038(2) -0.0002(18) 0.0138(19) 0.004(2)
C50 0.029(2) 0.037(2) 0.051(3) 0.008(2) 0.0101(19) 0.0044(19)
C51 0.028(2) 0.034(2) 0.036(2) 0.0035(17) 0.0014(17) -0.0023(17)
C52 0.036(2) 0.0255(19) 0.036(2) -0.0020(16) 0.0051(18) -0.0035(17)
C53 0.058(3) 0.056(3) 0.045(3) -0.008(2) 0.015(2) -0.033(3)
C54 0.067(4) 0.089(4) 0.051(3) -0.021(3) 0.013(3) -0.052(4)
C55 0.057(3) 0.061(3) 0.044(3) -0.020(2) 0.003(2) -0.029(3)
C56 0.042(2) 0.039(2) 0.035(2) -0.0042(19) 0.0031(19) -0.008(2)
C57 0.029(2) 0.034(2) 0.034(2) -0.0008(17) 0.0044(17) -0.0031(17)
C58 0.056(3) 0.031(2) 0.034(2) 0.0007(18) 0.007(2) 0.016(2)
C59 0.095(5) 0.040(3) 0.060(3) 0.017(3) 0.039(3) 0.022(3)
C60 0.140(7) 0.039(3) 0.064(4) 0.014(3) 0.051(4) 0.033(4)
C61 0.131(7) 0.044(3) 0.051(3) 0.006(3) 0.009(4) 0.042(4)
C62 0.063(4) 0.058(3) 0.067(4) -0.011(3) -0.005(3) 0.030(3)
C63 0.046(3) 0.034(2) 0.047(3) -0.010(2) -0.001(2) 0.012(2)
C64 0.0249(18) 0.035(2) 0.0244(18) 0.0007(16) 0.0004(15) 0.0037(16)
C65 0.0238(19) 0.039(2) 0.0256(18) -0.0002(16) -0.0007(15) 0.0011(17)
C66 0.0234(19) 0.033(2) 0.0322(19) 0.0033(17) -0.0028(15) 0.0008(16)
C67 0.0225(18) 0.0310(19) 0.0296(18) 0.0015(16) -0.0022(15) 0.0021(16)
C68 0.0203(18) 0.052(2) 0.0225(17) 0.0029(17) -0.0013(14) 0.0025(18)
C69 0.0241(19) 0.055(3) 0.0204(17) 0.0034(17) -0.0025(15) 0.0043(19)
C70 0.025(2) 0.053(3) 0.0270(19) -0.0035(18) -0.0002(16) 0.0083(19)
C71 0.027(2) 0.051(2) 0.0220(18) 0.0013(17) -0.0008(15) 0.0068(19)
C72 0.0246(19) 0.058(3) 0.0265(19) 0.0093(19) 0.0019(16) 0.013(2)
C73 0.030(2) 0.051(3) 0.0299(19) 0.0054(19) 0.0061(16) 0.012(2)
C74 0.0284(19) 0.042(2) 0.0251(18) 0.0059(17) 0.0001(16) 0.0009(18)
C75 0.0246(18) 0.040(2) 0.0259(18) 0.0054(16) -0.0014(15) -0.0016(17)
C76 0.0194(17) 0.038(2) 0.0292(18) 0.0036(17) 0.0012(15) 0.0015(16)
C77 0.049(3) 0.092(4) 0.038(2) 0.000(3) 0.001(2) 0.043(3)
C78 0.034(2) 0.078(4) 0.040(2) 0.011(3) 0.008(2) 0.023(3)
C79 0.057(3) 0.076(4) 0.051(3) 0.014(3) 0.009(3) 0.032(3)
C80 0.052(3) 0.082(4) 0.063(3) 0.024(3) 0.009(3) 0.029(3)
C81 0.028(2) 0.091(4) 0.062(3) 0.043(3) 0.005(2) 0.015(3)
C82 0.029(2) 0.075(4) 0.064(3) 0.033(3) -0.007(2) -0.002(2)
C83 0.038(3) 0.070(4) 0.052(3) 0.024(3) -0.001(2) 0.017(3)
C84 0.034(2) 0.038(2) 0.0282(19) 0.0032(17) 0.0035(17) -0.0016(19)
C85 0.051(3) 0.035(2) 0.0232(18) 0.0030(16) -0.0053(18) -0.002(2)
C86 0.049(3) 0.044(2) 0.030(2) -0.0026(18) -0.0106(19) 0.004(2)
C87 0.090(4) 0.044(3) 0.047(3) 0.008(2) -0.034(3) -0.012(3)
C88 0.068(4) 0.070(3) 0.031(2) 0.014(2) 0.008(2) 0.025(3)
O16 0.063(4) 0.053(4) 0.038(3) 0.002(3) 0.001(3) -0.008(3)
C93 0.056(5) 0.060(5) 0.036(4) 0.004(4) -0.007(3) -0.011(4)
C94 0.045(4) 0.077(5) 0.071(5) -0.037(4) 0.029(4) -0.013(4)
C95 0.066(6) 0.044(5) 0.060(5) -0.009(4) 0.000(4) -0.011(4)
C96 0.060(5) 0.033(4) 0.058(4) 0.011(4) -0.024(4) -0.036(4)
O15 0.116(7) 0.104(7) 0.029(4) 0.011(5) -0.021(5) 0.014(7)
C89 0.146(10) 0.060(7) 0.019(5) 0.005(5) -0.010(7) 0.038(7)
C90 0.143(10) 0.056(8) 0.058(9) -0.004(7) -0.042(10) 0.006(9)
C91 0.134(9) 0.027(5) 0.009(4) -0.001(3) -0.005(6) 0.036(6)
C92 0.171(14) 0.055(7) 0.014(4) -0.004(5) -0.010(7) -0.003(9)
 
_geom_special_details
;
 All esds (except the esd in the dihedral angle between two l.s. planes)
 are estimated using the full covariance matrix.  The cell esds are taken
 into account individually in the estimation of esds in distances, angles
 and torsion angles; correlations between esds in cell parameters are only
 used when they are defined by crystal symmetry.  An approximate (isotropic)
 treatment of cell esds is used for estimating esds involving l.s. planes.
;
 
loop_
 _geom_bond_atom_site_label_1
 _geom_bond_atom_site_label_2
 _geom_bond_distance
 _geom_bond_site_symmetry_2
 _geom_bond_publ_flag
O1 C22 1.389(5) . ?
O2 C26 1.345(5) . ?
O2 C24 1.465(5) . ?
O3 C26 1.333(5) . ?
O3 C25 1.445(5) . ?
O4 C26 1.189(5) . ?
O5 C32 1.359(5) . ?
O5 C33 1.430(5) . ?
O6 C40 1.209(5) . ?
O7 C40 1.342(5) . ?
O7 C41 1.483(5) . ?
O8 C65 1.399(5) . ?
O9 C70 1.347(5) . ?
O9 C68 1.453(5) . ?
O10 C70 1.332(6) . ?
O10 C69 1.438(5) . ?
O11 C70 1.192(5) . ?
O12 C72 1.372(5) . ?
O12 C77 1.434(6) . ?
O13 C84 1.200(5) . ?
O14 C84 1.330(5) . ?
O14 C85 1.484(5) . ?
N1 C23 1.467(5) . ?
N1 C20 1.476(5) . ?
N1 C1 1.487(5) . ?
N2 C28 1.399(5) . ?
N2 C21 1.471(5) . ?
N2 C22 1.484(5) . ?
N3 C64 1.459(5) . ?
N3 C67 1.472(5) . ?
N3 C45 1.488(5) . ?
N4 C76 1.401(5) . ?
N4 C66 1.478(5) . ?
N4 C65 1.481(5) . ?
C1 C2 1.535(5) . ?
C1 C14 1.545(6) . ?
C1 C8 1.551(5) . ?
C2 C3 1.377(6) . ?
C2 C7 1.399(6) . ?
C3 C4 1.387(6) . ?
C4 C5 1.381(7) . ?
C5 C6 1.398(7) . ?
C6 C7 1.379(7) . ?
C8 C13 1.386(5) . ?
C8 C9 1.399(5) . ?
C9 C10 1.388(6) . ?
C10 C11 1.387(6) . ?
C11 C12 1.383(6) . ?
C12 C13 1.402(5) . ?
C14 C19 1.381(6) . ?
C14 C15 1.392(6) . ?
C15 C16 1.361(6) . ?
C16 C17 1.385(6) . ?
C17 C18 1.381(6) . ?
C18 C19 1.380(6) . ?
C20 C23 1.492(5) . ?
C20 C21 1.503(5) . ?
C22 C23 1.542(5) . ?
C22 C24 1.558(5) . ?
C24 C27 1.493(5) . ?
C24 C25 1.525(5) . ?
C27 C32 1.383(6) . ?
C27 C28 1.394(5) . ?
C28 C29 1.390(5) . ?
C29 C30 1.396(6) . ?
C30 C31 1.393(6) . ?
C30 C40 1.515(5) . ?
C31 C32 1.395(6) . ?
C33 C34 1.494(6) . ?
C34 C39 1.391(6) . ?
C34 C35 1.401(6) . ?
C35 C36 1.388(6) . ?
C36 C37 1.391(7) . ?
C37 C38 1.383(6) . ?
C38 C39 1.387(6) . ?
C41 C44 1.501(7) . ?
C41 C42 1.510(8) . ?
C41 C43 1.538(7) . ?
C45 C58 1.535(6) . ?
C45 C52 1.536(6) . ?
C45 C46 1.538(6) . ?
C46 C51 1.385(6) . ?
C46 C47 1.401(6) . ?
C47 C48 1.382(6) . ?
C48 C49 1.391(7) . ?
C49 C50 1.388(7) . ?
C50 C51 1.394(6) . ?
C52 C53 1.387(7) . ?
C52 C57 1.400(6) . ?
C53 C54 1.382(8) . ?
C54 C55 1.391(8) . ?
C55 C56 1.377(7) . ?
C56 C57 1.379(6) . ?
C58 C63 1.380(7) . ?
C58 C59 1.399(8) . ?
C59 C60 1.366(8) . ?
C60 C61 1.373(11) . ?
C61 C62 1.388(10) . ?
C62 C63 1.395(7) . ?
C64 C67 1.478(5) . ?
C64 C65 1.524(6) . ?
C65 C68 1.553(6) . ?
C66 C67 1.514(6) . ?
C68 C71 1.495(5) . ?
C68 C69 1.545(6) . ?
C71 C72 1.392(6) . ?
C71 C76 1.396(6) . ?
C72 C73 1.391(6) . ?
C73 C74 1.398(6) . ?
C74 C75 1.394(6) . ?
C74 C84 1.507(6) . ?
C75 C76 1.386(6) . ?
C77 C78 1.495(7) . ?
C78 C83 1.384(8) . ?
C78 C79 1.390(8) . ?
C79 C80 1.388(8) . ?
C80 C81 1.372(10) . ?
C81 C82 1.390(9) . ?
C82 C83 1.398(7) . ?
C85 C87 1.502(7) . ?
C85 C88 1.514(7) . ?
C85 C86 1.519(6) . ?
O16 C95 1.376(11) . ?
O16 C93 1.433(10) . ?
C93 C94 1.452(12) . ?
C95 C96 1.593(12) . ?
O15 C91 1.312(15) . ?
O15 C89 1.410(15) . ?
C89 C90 1.502(18) . ?
C91 C92 1.550(12) . ?
 
loop_
 _geom_angle_atom_site_label_1
 _geom_angle_atom_site_label_2
 _geom_angle_atom_site_label_3
 _geom_angle
 _geom_angle_site_symmetry_1
 _geom_angle_site_symmetry_3
 _geom_angle_publ_flag
C26 O2 C24 110.3(3) . . ?
C26 O3 C25 110.0(3) . . ?
C32 O5 C33 116.7(3) . . ?
C40 O7 C41 120.5(3) . . ?
C70 O9 C68 110.7(3) . . ?
C70 O10 C69 110.6(3) . . ?
C72 O12 C77 115.6(4) . . ?
C84 O14 C85 121.0(3) . . ?
C23 N1 C20 60.9(2) . . ?
C23 N1 C1 122.0(3) . . ?
C20 N1 C1 117.2(3) . . ?
C28 N2 C21 119.3(3) . . ?
C28 N2 C22 106.4(3) . . ?
C21 N2 C22 107.5(3) . . ?
C64 N3 C67 60.6(2) . . ?
C64 N3 C45 122.2(3) . . ?
C67 N3 C45 117.8(3) . . ?
C76 N4 C66 118.9(3) . . ?
C76 N4 C65 107.0(3) . . ?
C66 N4 C65 108.4(3) . . ?
N1 C1 C2 109.4(3) . . ?
N1 C1 C14 105.2(3) . . ?
C2 C1 C14 104.9(3) . . ?
N1 C1 C8 113.1(3) . . ?
C2 C1 C8 109.8(3) . . ?
C14 C1 C8 113.9(3) . . ?
C3 C2 C7 118.2(4) . . ?
C3 C2 C1 122.1(4) . . ?
C7 C2 C1 119.6(4) . . ?
C2 C3 C4 120.8(4) . . ?
C5 C4 C3 120.9(4) . . ?
C4 C5 C6 119.0(4) . . ?
C7 C6 C5 119.6(5) . . ?
C6 C7 C2 121.5(4) . . ?
C13 C8 C9 118.1(4) . . ?
C13 C8 C1 122.7(3) . . ?
C9 C8 C1 119.2(3) . . ?
C10 C9 C8 121.4(4) . . ?
C11 C10 C9 119.9(4) . . ?
C12 C11 C10 119.3(4) . . ?
C11 C12 C13 120.7(4) . . ?
C8 C13 C12 120.4(4) . . ?
C19 C14 C15 117.7(4) . . ?
C19 C14 C1 120.8(3) . . ?
C15 C14 C1 121.2(4) . . ?
C16 C15 C14 121.6(4) . . ?
C15 C16 C17 120.7(4) . . ?
C18 C17 C16 118.2(4) . . ?
C19 C18 C17 121.1(4) . . ?
C18 C19 C14 120.7(4) . . ?
N1 C20 C23 59.3(3) . . ?
N1 C20 C21 111.7(3) . . ?
C23 C20 C21 108.6(3) . . ?
N2 C21 C20 104.7(3) . . ?
O1 C22 N2 113.2(3) . . ?
O1 C22 C23 104.8(3) . . ?
N2 C22 C23 104.0(3) . . ?
O1 C22 C24 113.4(3) . . ?
N2 C22 C24 103.8(3) . . ?
C23 C22 C24 117.4(3) . . ?
N1 C23 C20 59.8(2) . . ?
N1 C23 C22 112.9(3) . . ?
C20 C23 C22 105.4(3) . . ?
O2 C24 C27 108.5(3) . . ?
O2 C24 C25 102.0(3) . . ?
C27 C24 C25 120.6(4) . . ?
O2 C24 C22 107.8(3) . . ?
C27 C24 C22 102.7(3) . . ?
C25 C24 C22 114.7(3) . . ?
O3 C25 C24 104.5(3) . . ?
O4 C26 O3 124.5(4) . . ?
O4 C26 O2 124.1(4) . . ?
O3 C26 O2 111.5(3) . . ?
C32 C27 C28 121.8(3) . . ?
C32 C27 C24 129.6(4) . . ?
C28 C27 C24 108.6(3) . . ?
C29 C28 C27 120.7(4) . . ?
C29 C28 N2 127.4(3) . . ?
C27 C28 N2 111.8(3) . . ?
C28 C29 C30 116.6(3) . . ?
C31 C30 C29 123.4(4) . . ?
C31 C30 C40 116.2(4) . . ?
C29 C30 C40 120.4(3) . . ?
C30 C31 C32 118.8(4) . . ?
O5 C32 C27 116.4(3) . . ?
O5 C32 C31 125.0(4) . . ?
C27 C32 C31 118.7(4) . . ?
O5 C33 C34 109.9(3) . . ?
C39 C34 C35 119.1(4) . . ?
C39 C34 C33 122.0(4) . . ?
C35 C34 C33 118.8(4) . . ?
C36 C35 C34 119.7(5) . . ?
C35 C36 C37 120.8(4) . . ?
C38 C37 C36 119.4(4) . . ?
C37 C38 C39 120.2(4) . . ?
C38 C39 C34 120.7(4) . . ?
O6 C40 O7 126.1(4) . . ?
O6 C40 C30 123.2(4) . . ?
O7 C40 C30 110.8(3) . . ?
O7 C41 C44 110.3(4) . . ?
O7 C41 C42 101.7(4) . . ?
C44 C41 C42 111.1(4) . . ?
O7 C41 C43 109.4(4) . . ?
C44 C41 C43 113.2(4) . . ?
C42 C41 C43 110.4(5) . . ?
N3 C45 C58 108.7(3) . . ?
N3 C45 C52 105.2(3) . . ?
C58 C45 C52 105.1(3) . . ?
N3 C45 C46 112.6(3) . . ?
C58 C45 C46 110.0(3) . . ?
C52 C45 C46 114.9(3) . . ?
C51 C46 C47 117.7(4) . . ?
C51 C46 C45 123.3(4) . . ?
C47 C46 C45 118.9(4) . . ?
C48 C47 C46 122.0(4) . . ?
C47 C48 C49 119.4(4) . . ?
C50 C49 C48 119.6(4) . . ?
C49 C50 C51 120.2(4) . . ?
C46 C51 C50 121.1(4) . . ?
C53 C52 C57 117.5(4) . . ?
C53 C52 C45 121.0(4) . . ?
C57 C52 C45 121.0(4) . . ?
C54 C53 C52 120.6(5) . . ?
C53 C54 C55 121.2(5) . . ?
C56 C55 C54 118.5(5) . . ?
C55 C56 C57 120.4(4) . . ?
C56 C57 C52 121.7(4) . . ?
C63 C58 C59 117.5(5) . . ?
C63 C58 C45 122.7(4) . . ?
C59 C58 C45 119.7(5) . . ?
C60 C59 C58 122.8(6) . . ?
C59 C60 C61 119.1(7) . . ?
C60 C61 C62 119.6(5) . . ?
C61 C62 C63 120.6(6) . . ?
C58 C63 C62 120.1(5) . . ?
N3 C64 C67 60.1(3) . . ?
N3 C64 C65 113.4(3) . . ?
C67 C64 C65 106.9(3) . . ?
O8 C65 N4 113.2(3) . . ?
O8 C65 C64 104.5(3) . . ?
N4 C65 C64 103.8(3) . . ?
O8 C65 C68 113.0(3) . . ?
N4 C65 C68 103.9(3) . . ?
C64 C65 C68 118.3(3) . . ?
N4 C66 C67 103.9(3) . . ?
N3 C67 C64 59.3(2) . . ?
N3 C67 C66 111.9(3) . . ?
C64 C67 C66 108.4(3) . . ?
O9 C68 C71 109.0(3) . . ?
O9 C68 C69 102.6(3) . . ?
C71 C68 C69 118.1(4) . . ?
O9 C68 C65 108.1(3) . . ?
C71 C68 C65 102.9(3) . . ?
C69 C68 C65 115.9(3) . . ?
O10 C69 C68 104.3(3) . . ?
O11 C70 O10 125.2(4) . . ?
O11 C70 O9 123.1(4) . . ?
O10 C70 O9 111.8(4) . . ?
C72 C71 C76 121.1(4) . . ?
C72 C71 C68 130.1(4) . . ?
C76 C71 C68 108.8(4) . . ?
O12 C72 C73 124.7(4) . . ?
O12 C72 C71 116.4(4) . . ?
C73 C72 C71 118.9(4) . . ?
C72 C73 C74 119.1(4) . . ?
C75 C74 C73 122.5(4) . . ?
C75 C74 C84 122.0(4) . . ?
C73 C74 C84 115.5(4) . . ?
C76 C75 C74 117.5(4) . . ?
C75 C76 C71 120.7(4) . . ?
C75 C76 N4 127.9(4) . . ?
C71 C76 N4 111.4(3) . . ?
O12 C77 C78 109.2(4) . . ?
C83 C78 C79 119.5(5) . . ?
C83 C78 C77 123.8(5) . . ?
C79 C78 C77 116.7(6) . . ?
C80 C79 C78 120.2(7) . . ?
C81 C80 C79 120.0(6) . . ?
C80 C81 C82 120.8(5) . . ?
C81 C82 C83 119.0(6) . . ?
C78 C83 C82 120.4(6) . . ?
O13 C84 O14 126.2(4) . . ?
O13 C84 C74 122.9(4) . . ?
O14 C84 C74 110.9(4) . . ?
O14 C85 C87 108.0(4) . . ?
O14 C85 C88 109.8(4) . . ?
C87 C85 C88 114.5(5) . . ?
O14 C85 C86 102.1(3) . . ?
C87 C85 C86 110.3(4) . . ?
C88 C85 C86 111.4(4) . . ?
C95 O16 C93 111.3(7) . . ?
O16 C93 C94 101.2(7) . . ?
O16 C95 C96 109.0(7) . . ?
C91 O15 C89 107.3(12) . . ?
O15 C89 C90 107.9(12) . . ?
O15 C91 C92 107.4(9) . . ?
 
_diffrn_measured_fraction_theta_max    0.999
_diffrn_reflns_theta_full              26.40
_diffrn_measured_fraction_theta_full   0.999
_refine_diff_density_max    0.867
_refine_diff_density_min   -0.569
_refine_diff_density_rms    0.072

#===END
